# Supplementary material for: Collaborative care for the detection and management of depression among adults with hypertension in South Africa: study protocol for the PRIME-SA randomised controlled trial
Source: Springer Nature journal article supplement (doi:10.1186/s13063-018-2518-6), 2018-03-22
Supplement: MOESM5 [file 15557174]

# Baseline (English)

Last Modified by: Mopenzi Support - 18 on 20 Oct 2015 08:46:31 Revision number: 2431 Field Count: 388

---

## Section 1. Intro

### 1.1 intro\_0

This is the baseline survey. Press NEXT to start.

---

### 1.2 CalculatedAgeYears

Numeric

This field is not displayed on the device

---

### 1.3 meansbp\_0

Numeric

This field is not displayed on the device

---

### 1.4 meandbp\_0

Numeric

This field is not displayed on the device

---

### 1.5 ref\_suicA\_0

Numeric

This field is not displayed on the device, Value: 0

---

### 1.6 ref\_suicB\_0

Numeric

This field is not displayed on the device, Value: 0

---

### 1.7 CalculatedVLReference

Numeric

This field is not displayed on the device

---

### 1.8 ref\_vl\_0

Numeric

This field is not displayed on the device, Value: 0

---

#### Prerequisites

Skip when *meansbp\_0 (1.3)* Greater Than '180' AND

Skip when *meandbp\_0 (1.4)* Equals '110'

### 1.9 ref\_bp\_0

Numeric

This field is not displayed on the device, Value: 0

---

#### 1.10 facilitycode\_0

Please select your clinic

Expects a single option response (required), Default: Test Clinic

Test Clinic [tst]

---

#### 1.11 fw\_code\_0

[Interviewer Code]:

Expects a single option response (required)

- Alberth Sotyantya [AS]
  - Aubrey Malebo [AM]
  - Babalwa Zani [BZ]
  - Bafedile Modise [BM]
  - Buyisiwe Jaas [BJ]
  - Daniella Georgeu-Pepper [DGP]
  - Deanna Carter [DC]
  - James Matlabaphiri [JM]
  - Lelethu Mahamba [LM]
  - Keitumtsetse Manche [KM]
  - Montsheng Nqoi [MN]
  - Mpho Molatsane [MM]
  - Nomsa Mudzanani [NM]
  - Odiseng (OJ) More [OJ]
  - Petronella Makhale [PM]
  - Primrose Mpaphane [PR]
  - Selinah Sepeng [SS]
  - Stokie Olifant [SO]
  - Venessa Timmerman [VT]
  - Vinolia Ntjikelane [VN]
  - Zakaria Siwata [ZS]
- 

#### 1.12 sid\_0

Numeric

This field is not displayed on the device, Value: 0

---

#### 1.13 devicecode\_0

Text

This field is not displayed on the device, Value: 01

---

#### 1.14 sequence\_0

Text

This field is not displayed on the device

---

#### 1.15 test\_0

Numeric

This field is not displayed on the device, Value: 0

---

**1.16** `eff_0`

**Numeric**

This field is not displayed on the device

---

**1.17** `bmi_00`

**Decimal**

This field is not displayed on the device, Value: 0

---

**1.18** `reached_end_0`

**Numeric**

This field is not displayed on the device, Value: 0

---

## Section 2. Embedded SID Html

### 2.1 SIDHTML

#### Text

This field is not displayed on the device.

---

## Section 3. Embedded Summary Html

### 3.1 SummaryHTML

#### Text

This field is not displayed on the device.

---

## Section 4. Eligibility

### 4.1 interview\_date\_0

Date of interview:

Expects a date response (required)

*Constraints*

Response must be *Less Than or Equal* 'DATENOW' AND

Response must be *Greater Than or Equal* 'DATEADD(DATENOW,-7)'

### 4.2 preconsent\_0

As you have heard from my assistant, we are conducting two studies to evaluate a programme and we are looking for people with certain criteria to take part. I would like to start by asking you a few questions to see whether you qualify to take part in either or both of the studies. Some of these questions are about your psychological well-being and may be sensitive. You are free to stop the interview at any time and this will not affect your usual care at the clinic. Are you willing to continue with the questionnaire?

Expects a single option response (required)

Yes [1]

No [0]

*Branches*

If response *Not Equal* 'Yes [1]' then skip to *no\_preconsent\_0 (15.6)*

### 4.3 birthdate\_0

What is your date of birth?

Expects a date response (required)

### 4.4 SetCalculatedAgeYears

Operator

This field is not displayed on the device. Operator: `Set( CalculatedAgeYears (1.2) , ROUND( DIVISION OF ( DAYSBEWEEN(Q513075, DATENOW ) ,365) ,2) )`

### 4.5 age\_confirm\_0

Please confirm that **CalculatedAgeYears (1.2)** is your correct age.

Expects a single option response (required)

Yes [1]

No [0]

*Branches*

If response *Equals* 'No [0]' then skip to *birthdate\_0 (4.3)*

*Prerequisites*

Skip when *CalculatedAgeYears (1.2)* *Greater Than* '18.00' OR

Skip when *CalculatedAgeYears (1.2)* *Equals* '18.00'

### 4.6 age\_under18\_0

Your age is less than 18 therefore you do not qualify to participate. Please select PROCEED to continue.

Expects a single option response (required)

Proceed [1]

*Branches*

If response *Equals* 'Proceed [1]' then skip to *age\_less18\_0 (15.7)*

#### 4.7 area\_0

Are you planning to stay in the area for the next year?

Expects a single option response (required)

Yes [1]

No [0]

#### Branches

If response Equals 'No [0]' then skip to *no\_area\_0 (15.8)*

---

## Section 5. PHQ

### 5.1 phq\_intro\_0

Over the last 2 weeks, how often have you been bothered by any of the following problems?

---

### 5.2 phq1\_0

Over the last 2 weeks, how often have you been bothered by: Little interest or pleasure in doing things

Expects a single option response (required)

- 0 days [0]
  - 1 - 7 days [1]
  - 8 - 11 days [2]
  - 12 -14 days [3]
- 

### 5.3 phq2\_0

Over the last 2 weeks, how often have you been bothered by: Feeling down, depressed, or hopeless

Expects a single option response (required)

- 0 days [0]
  - 1 - 7 days [1]
  - 8 - 11 days [2]
  - 12 -14 days [3]
- 

### 5.4 phq3\_0

Over the last 2 weeks, how often have you been bothered by: Trouble falling or staying asleep, or sleeping too much

Expects a single option response (required)

- 0 days [0]
  - 1 - 7 days [1]
  - 8 - 11 days [2]
  - 12 -14 days [3]
- 

### 5.5 phq4\_0

Over the last 2 weeks, how often have you been bothered by: Feeling tired or having little energy

Expects a single option response (required)

- 0 days [0]
  - 1 - 7 days [1]
  - 8 - 11 days [2]
  - 12 -14 days [3]
- 

### 5.6 phq5\_0

Over the last 2 weeks, how often have you been bothered by: Poor appetite or overeating

Expects a single option response (required)

- 0 days [0]
  - 1 - 7 days [1]
  - 8 - 11 days [2]
  - 12 -14 days [3]
-



#### 5.7 phq6\_0

Over the last 2 weeks, how often have you been bothered by: Feeling bad about yourself - or that you are a failure or have let yourself or your family down

Expects a single option response (required)

- 0 days [0]
  - 1 - 7 days [1]
  - 8 - 11 days [2]
  - 12 -14 days [3]
- 

#### 5.8 phq7\_0

Over the last 2 weeks, how often have you been bothered by: Trouble concentrating on things, such as reading the newspaper or watching television

Expects a single option response (required)

- 0 days [0]
  - 1 - 7 days [1]
  - 8 - 11 days [2]
  - 12 -14 days [3]
- 

#### 5.9 phq8\_0

Over the last 2 weeks, how often have you been bothered by: Moving or speaking so slowly that other people could have noticed? Or the opposite - being so fidgety or restless that you have been moving around a lot more than usual

Expects a single option response (required)

- 0 days [0]
  - 1 - 7 days [1]
  - 8 - 11 days [2]
  - 12 -14 days [3]
- 

#### 5.10 phq9a\_0

Over the last 2 weeks, how often have you been bothered by: Thoughts that you would be better off dead or of hurting yourself in some way

Expects a single option response (required)

- 0 days [0]
- 1 - 7 days [1]
- 8 - 11 days [2]
- 12 -14 days [3]

Branches

If response Equals '0 days [0]' then skip to *phqscore\_0 (5.15)*

---

#### 5.11 phq9b\_0

I am concerned about your answer to this last question, and would like to ask you again. Thinking back over the past two weeks, how often have you been bothered by thoughts that you would be better off dead or hurting yourself in some way.

Expects a single option response (required)

- 0 days [0]
- 1 - 7 days [1]
- 8 - 11 days [2]
- 12 -14 days [3]

Branches

If response Equals '0 days [0]' then skip to *phqscore\_0 (5.15)*

---

**Prerequisites**

Skip when *phq9b\_0* (5.11) Equals '0 days [0]' OR  
Skip when *phq9b\_0* (5.11) Equals '8 - 11 days [2]' OR  
Skip when *phq9b\_0* (5.11) Equals '12 -14 days [3]'

**5.12 SetRefSuicideLeaflet\_0**

**Operator**

This field is not displayed on the device, Operator: `Set( ref_suicA_0 (1.5) ,1)`

---

**Prerequisites**

Skip when *phq9b\_0* (5.11) Equals '0 days [0]' OR  
Skip when *phq9b\_0* (5.11) Equals '1 - 7 days [1]'

**5.13 SetRefSuicideLeafletB\_0**

**Operator**

This field is not displayed on the device, Operator: `Set( ref_suicB_0 (1.6) ,1)`

---

**Prerequisites**

Skip when *phq9b\_0* (5.11) Equals '1 - 7 days [1]'

**5.14 SetRefSuicideNurse\_0**

**Operator**

This field is not displayed on the device, Operator: `Set( ref_suicA_0 (1.5) ,1)`

---

**5.15 phqscore\_0**

**Numeric**

This field is not displayed on the device, Value: 0

---

**5.16 phqscore\_set\_0**

**Operator**

This field is not displayed on the device, Operator: `__{SET(513101,__{SUM( phq1_0 (5.2) , phq2_0 (5.3) , phq3_0 (5.4) , phq4_0 (5.5) , phq5_0 (5.6) , phq6_0 (5.7) , phq7_0 (5.8) , phq8_0 (5.9) , phq9a_0 (5.10) )})__}`

---

**Prerequisites**

Skip when *phq9a\_0* (5.10) Equals '0 days [0]'

**5.17 phqscore\_setb\_0**

**Operator**

This field is not displayed on the device, Operator: `__{SET(513101,__{SUM( phq1_0 (5.2) , phq2_0 (5.3) , phq3_0 (5.4) , phq4_0 (5.5) , phq5_0 (5.6) , phq6_0 (5.7) , phq7_0 (5.8) , phq8_0 (5.9) , phq9b_0 (5.11) )})__}`

---

**Prerequisites**

Skip when *phq1\_0* (5.2) Equals '0 days [0]' AND  
Skip when *phq2\_0* (5.3) Equals '0 days [0]' AND  
Skip when *phq3\_0* (5.4) Equals '0 days [0]' AND  
Skip when *phq4\_0* (5.5) Equals '0 days [0]' AND  
Skip when *phq5\_0* (5.6) Equals '0 days [0]' AND  
Skip when *phq7\_0* (5.8) Equals '0 days [0]' AND  
Skip when *phq8\_0* (5.9) Equals '0 days [0]' AND  
Skip when *phq9a\_0* (5.10) Equals '0 days [0]'

**5.18 phq10\_0**

If you checked off any problems, how difficult have these problems made it for you to do your work, take care of things at home, or get along with other people?

Expects a single option response (required)

- not difficult at all [0]
  - somewhat difficult [1]
  - very difficult [2]
  - extremely difficult [3]
-

#### 5.19 rx\_hpt\_0

Are you currently taking medicine for high blood pressure (hypertension or high blood)?

Expects a single option response (required)

Yes [1]

No [0]

---

#### 5.20 rx\_hiv\_0

Are you currently taking ARVs (antiretrovirals)?

Expects a single option response (required)

Yes [1]

No [0]

---

##### Prerequisites

Skip when rx\_hpt\_0 (5.19) Equals 'No [0]' OR

Skip when rx\_hiv\_0 (5.20) Equals 'No [0]' OR

Skip when phqscore\_0 (5.15) Less Than '9'

#### 5.21 seteft\_both\_0

##### Operator

This field is not displayed on the device, Operator: Set( eft\_0 (1.16) ,3)

---

##### Prerequisites

Skip when rx\_hpt\_0 (5.19) Equals 'No [0]' OR

Skip when rx\_hiv\_0 (5.20) Equals 'No [0]' OR

Skip when phqscore\_0 (5.15) Less Than '9'

#### 5.22 cobaltandprime\_elig\_0

You qualify for both studies (COBALT and PRIME) and we would like you to take part. I will go through the written information with you and if you would like to take part then we will ask you to sign the form saying you are willing to participate. I will then go through the questionnaire with you, check your measurements (blood pressure, weight, height and waist circumference), and we may want to take a blood sample. [Select PROCEED to continue.]

Expects a single option response (required)

Proceed [1]

##### Branches

If response Equals 'Proceed [1]' then skip to consent\_instr\_0 (6.1)

---

##### Prerequisites

Skip when rx\_hpt\_0 (5.19) Equals 'Yes [1]' OR

Skip when phqscore\_0 (5.15) Less Than '9'

#### 5.23 seteft\_cobalt\_0

##### Operator

This field is not displayed on the device, Operator: Set( eft\_0 (1.16) ,2)

---

##### Prerequisites

Skip when rx\_hiv\_0 (5.20) Equals 'Yes [1]' OR

Skip when phqscore\_0 (5.15) Less Than '9'

#### 5.24 seteft\_prime\_0

##### Operator

This field is not displayed on the device, Operator: Set( eft\_0 (1.16) ,1)

---

**Prerequisites**

Skip when *phqscore\_0 (5.15)* Less Than '9' OR  
Skip when *rx\_hpt\_0 (5.19)* Equals 'Yes [1]' OR  
Skip when *rx\_hiv\_0 (5.20)* Equals 'No [0]'

**5.25 cobaltonly\_elig\_0**

You qualify for one of our studies (COBALT) and we would like you to take part. I will go through the written information with you and if you would like to take part then we will ask you to sign the form saying you are willing to participate. I will then go through the questionnaire with you, check your measurements (blood pressure, weight, height and waist circumference), and we may want to take a blood sample. [Select PROCEED to continue.]

Expects a single option response (required)

Proceed [1]

**Branches**

If response Equals 'Proceed [1]' then skip to *consent\_instr\_0 (6.1)*

---

**Prerequisites**

Skip when *phqscore\_0 (5.15)* Less Than '9' OR  
Skip when *rx\_hiv\_0 (5.20)* Equals 'Yes [1]' OR  
Skip when *rx\_hpt\_0 (5.19)* Equals 'No [0]'

**5.26 primeonly\_elig\_0**

You qualify for one of our studies (PRIME) and we would like you to take part. I will go through the written information with you and if you would like to take part then we will ask you to sign the form saying you are willing to participate. I will then go through the questionnaire with you, check your measurements (blood pressure, weight, height and waist circumference). [Select PROCEED to continue.]

Expects a single option response (required)

Proceed [1]

**Branches**

If response Equals 'Proceed [1]' then skip to *consent\_instr\_0 (6.1)*

---

**Prerequisites**

Skip when *phqscore\_0 (5.15)* Less Than '9' OR  
Skip when *rx\_hpt\_0 (5.19)* Equals 'Yes [1]' OR  
Skip when *rx\_hiv\_0 (5.20)* Equals 'Yes [1]'

**5.27 seteft\_neither\_0**

**Operator**

This field is not displayed on the device, Operator: `Set( eft_0 (1.16) ,0)`

---

**5.28 not\_elig\_0**

We are looking for people with certain criteria or illnesses to take part in the study. You do not have the criteria we are looking for so we will not be able to include you in the study. Your usual care will not be affected by not taking part in our study. We would like to thank you very much for answering the questions and for your time today and we wish you well. [Select PROCEED to end the survey.]

Expects a single option response (required)

Proceed [1]

**Branches**

If response Equals 'Proceed [1]' then skip to *end\_0 (15.10)*

---

## Section 6. Patient consent

### 6.1 consent\_instr\_0

[Now go through patient information sheet and consent form.]

---

### 6.2 consent\_read\_0

[Please confirm that info has been read: must be confirmed in order to continue with the questionnaire]

Expects a single option response (required)

not confirmed [0]

confirmed [1]

Branches

If response Equals 'not confirmed [0]' then skip to *end\_0 (15.10)*

---

### 6.3 consent\_understood\_0

[Please confirm that info and consent has been understood and that the participant has the capacity to consent: must be confirmed in order to continue with the questionnaire.]

Expects a single option response (required)

not confirmed [0]

confirmed [1]

Branches

If response Equals 'not confirmed [0]' then skip to *end\_0 (15.10)*

---

### 6.4 consent\_willing\_0

Are you still willing to take part in the study/studies?

Expects a single option response (required)

Yes [1]

No [0]

Prerequisites

Skip when *consent\_willing\_0 (6.4)* Equals 'Yes [1]'

---

### 6.5 consent\_not\_willing\_0

[Please read the following:] We would like to thank you for your time today and we wish you well. [Select PROCEED to continue to the end of the survey.]

Expects a single option response (required)

Proceed [1]

Branches

If response Equals 'Proceed [1]' then skip to *end\_00 (15.11)*

---

### 6.6 consent\_signed\_0

[Please confirm that 2 copies of consent form have been signed: must be confirmed in order to continue with the questionnaire.]

Expects a single option response (required)

not confirmed [0]

confirmed [1]

Branches

If response Equals 'not confirmed [0]' then skip to *end\_0 (15.10)*

---



## Section 7. Questionnaire

### 7.1 name\_first\_0

I am now going to go through the questionnaire with you. Before we begin, please tell me what is your full English/Afrikaans first name(s)? E.g. John Peter

Expects a single line text response (optional)

### 7.2 name\_surset\_0

Please tell me what is your Setswana/Sotho/Zulu first name you might use? E.g. Mpumelelo

Expects a single line text response (optional)

### 7.3 name\_sureng\_0

Please tell me what is your surname?

Expects a single line text response (required)

### 7.4 name\_surmai\_0

Please tell me what is your maiden name?

Expects a single line text response (optional)

### 7.5 name\_init\_0

What are your initials? E.g. Joe John Soap = JJ

Expects a single line text response (required)

### 7.6 phone\_cell\_0

Please could you provide your cell phone number in case we need to contact you?

Expects a phone number (optional)

*Constraints*

*Response must be Match `^[0-9]{10}$`*

### 7.7 sex\_0

[Enter sex]

Expects a single option response (required)

female [1]

male [0]

### 7.8 study\_id\_0

[Please generate and write down Study ID on all relevant documents] MENUACTION(CUSTOMWEB,GENERATE SID)

### 7.9 bp\_instr\_0

We will need to take 3 blood pressure readings during the course of the interview, at least 2 minutes apart.

7.10 sbp1\_0

[Systolic blood pressure first reading]

Expects a numeric response (required)

Prerequisites

Skip when *sbp1\_0 (7.10)* Less Than '201'

7.11 sbp1\_high\_0

[You have entered an unusually high number. Please confirm or correct it.]

Expects a single option response (required)

Confirmed [0]

Correct it [1]

Branches

If response Equals 'Correct it [1]' then skip to *sbp1\_0 (7.10)*

Prerequisites

Skip when *sbp1\_0 (7.10)* Greater Than '89'

7.12 sbp1\_low\_confirm

[You have entered an unusually low number; please confirm or correct it.]

Expects a single option response (required)

Confirmed [0]

Correct it [1]

Branches

If response Equals 'Correct it [1]' then skip to *sbp1\_0 (7.10)*

7.13 dbp1\_0

[Diastolic blood pressure first reading]

Expects a numeric response (required)

Branches

If response Less Than '*sbp1\_0 (7.10)*' then skip to *his\_instr\_0 (7.15)*

7.14 dbp1moresbp1\_0

The systolic blood pressure must be larger than the diastolic blood pressure. [Please correct the blood pressure readings.]

Expects a single option response (optional)

Correct it [0]

Branches

If response Equals 'Correct it [0]' then skip to *sbp1\_0 (7.10)*

7.15 his\_instr\_0

I would like to start by asking you a few questions about your past illnesses: has a doctor or nurse ever told you that you have or have had any of the following:

7.16 his\_hpt\_0

Has a doctor or nurse ever told you that you have or have had high blood pressure (hypertension):

Expects a single option response (required)

No [0]

Yes [1]

7.17 his\_mi\_0

Has a doctor or nurse ever told you that you have or have had a heart attack:

Expects a single option response (required)

No [0]

Yes [1]

---

7.18 his\_cva\_0

Has a doctor or nurse ever told you that you have or have had a stroke:

Expects a single option response (required)

No [0]

Yes [1]

---

7.19 his\_ang\_0

Has a doctor or nurse ever told you that you have or have had angina (chest pains with exertion/activity):

Expects a single option response (required)

No [0]

Yes [1]

---

7.20 his\_dep\_0

Has a doctor or nurse ever told you that you have or have had depression:

Expects a single option response (required)

No [0]

Yes [1]

---

7.21 his\_tb\_0

Has a doctor or nurse ever told you that you have or have had TB:

Expects a single option response (required)

No [0]

Yes [1]

---

7.22 his\_dm\_0

Has a doctor or nurse ever told you that you have or have had diabetes (sugar):

Expects a single option response (required)

No [0]

Yes [1]

---

Prerequisites

Skip when sex\_0 (7.7) Equals 'male [0]'

7.23 his\_preg\_0

Are you pregnant at the moment?

Expects a single option response (required)

No [0]

Yes [1]

---



Prerequisites  
Skip when *sex\_0* (7.7) Equals 'male [0]'

7.24 *his\_baby\_0*

Have you had a baby in the last year?

Expects a single option response (required)

- No [0]
- Yes [1]

---

7.25 *rx\_dep\_instr\_0*

We would like to ask some questions about treatment you receive: Are you currently taking any of the following medications for depression:

---

7.26 *rx\_dep\_ami\_0*

Amitriptyline (Tryptanol, Trepiline)

Expects a single option response (required)

- No [0]
- Yes [1]
- Don't know [2]

Branches

If response Equals 'No [0]' then skip to *rx\_dep\_flu\_0* (7.31)

If response Equals 'Don't know [2]' then skip to *rx\_dep\_flu\_0* (7.31)

---

7.27 *rx\_dep\_ami\_d\_0*

Amitriptyline (Tryptanol, Trepiline): dose

Expects a single option response (optional)

- 10mg [10]
- 25mg [25]
- 50mg [50]
- 75mg [75]
- 100mg [100]
- 125mg [125]
- 150mg [150]
- 175mg [175]
- 200mg [200]
- 225mg [225]
- 250mg [250]
- 275mg [275]
- 300mg [300]
- Other, please specify [0]

---

Prerequisites  
Skip when *rx\_dep\_ami\_d\_0* (7.27) Not Equal 'Other, please specify [0]'

7.28 *rx\_dep\_ami\_d\_other\_0*

Amitriptyline (Tryptanol, Trepiline): dose other (please specify):

Expects a single line text response (optional)

7.29 rx\_dep\_ami\_f\_0

**Amitriptyline (Tryptanol, Trepiline): number of times per day**

Expects a single option response (optional)

- 1 [1]
- 2 [2]
- 3 [3]
- 4 [4]
- other [0]

**Prerequisites**

Skip when rx\_dep\_ami\_f\_0 (7.29) Not Equal 'other [0]'

7.30 rx\_dep\_ami\_f\_other\_0

**Amitriptyline (Tryptanol, Trepiline): number of times per day, other (please specify):**

Expects a numeric response (optional)

7.31 rx\_dep\_flu\_0

**Fluoxetine (Prozac, Nuzak, Lorien)**

Expects a single option response (required)

- No [0]
- Yes [1]
- Don't know [2]

**Branches**

If response Equals 'No [0]' then skip to rx\_dep\_cit\_0 (7.36)

If response Equals 'Don't know [2]' then skip to rx\_dep\_cit\_0 (7.36)

7.32 rx\_dep\_flu\_d\_0

**Fluoxetine (Prozac, Nuzak, Lorien): dose**

Expects a single option response (optional)

- 20mg [20]
- 40mg [40]
- 60mg [60]
- other [0]

**Prerequisites**

Skip when rx\_dep\_flu\_d\_0 (7.32) Not Equal 'other [0]'

7.33 rx\_dep\_flu\_d\_other\_0

**Fluoxetine (Prozac, Nuzak, Lorien): dose other (please specify):**

Expects a single line text response (optional)

7.34 rx\_dep\_flu\_f\_0

**Fluoxetine (Prozac, Nuzak, Lorien): number of times per day**

Expects a single option response (optional)

- 1 [1]
- 2 [2]
- 3 [3]
- 4 [4]
- other [0]

Prerequisites

Skip when *rx\_dep\_flu\_f\_0* (7.34) Not Equal 'other [0]'

7.35 *rx\_dep\_flu\_f\_other\_0*

Fluoxetine (Prozac, Nuzak, Lorien): number of times per day, other (please specify):

Expects a numeric response (optional)

7.36 *rx\_dep\_cit\_0*

Citalopram (Cipramil, Cilift)

Expects a single option response (required)

No [0]

Yes [1]

Don't know [2]

Branches

If response Equals 'No [0]' then skip to *rx\_dep\_imi\_0* (7.41)

If response Equals 'Don't know [2]' then skip to *rx\_dep\_imi\_0* (7.41)

7.37 *rx\_dep\_cit\_d\_0*

Citalopram (Cipramil, Cilift): dose

Expects a single option response (optional)

20mg [20]

40mg [40]

other [0]

Prerequisites

Skip when *rx\_dep\_cit\_d\_0* (7.37) Not Equal 'other [0]'

7.38 *rx\_dep\_cit\_d\_other\_0*

Citalopram (Cipramil, Cilift): dose, other (please specify):

Expects a single line text response (optional)

7.39 *rx\_dep\_cit\_f\_0*

Citalopram (Cipramil, Cilift): number of times per day

Expects a single option response (optional)

1 [1]

2 [2]

3 [3]

4 [4]

other [0]

Prerequisites

Skip when *rx\_dep\_cit\_f\_0* (7.39) Not Equal 'other [0]'

7.40 *rx\_dep\_cit\_f\_other\_0*

Citalopram (Cipramil, Cilift): number of times per day, other (please specify):

Expects a numeric response (optional)

7.41 rx\_dep\_imi\_0

**Imipramine (Tofranil)**

Expects a single option response (required)

- No [0]
- Yes [1]
- Don't know [2]

**Branches**

If response Equals 'No [0]' then skip to rx\_dep\_clo\_0 (7.46)

If response Equals 'Don't know [2]' then skip to rx\_dep\_clo\_0 (7.46)

---

7.42 rx\_dep\_imi\_d\_0

**Imipramine (Tofranil): dose**

Expects a single option response (required)

- 10mg [10]
- 25mg [25]
- 50mg [50]
- 75mg [75]
- 100mg [100]
- 125mg [125]
- 150mg [150]
- 175mg [175]
- 200mg [200]
- 225mg [225]
- 250mg [250]
- 275mg [275]
- 300mg [300]
- other [0]

**Prerequisites**

Skip when rx\_dep\_imi\_d\_0 (7.42) Not Equal 'other [0]'

---

7.43 rx\_dep\_imi\_d\_other\_0

**Imipramine (Tofranil): dose, other (please specify):**

Expects a single line text response (optional)

7.44 rx\_dep\_imi\_f\_0

**Imipramine (Tofranil): number of times per day**

Expects a single option response (required)

- 1 [1]
- 2 [2]
- 3 [3]
- 4 [4]
- other [0]

**Prerequisites**

Skip when rx\_dep\_imi\_f\_0 (7.44) Not Equal 'other [0]'

---

7.45 rx\_dep\_imi\_f\_other\_0

**Imipramine (Tofranil): number of times per day, other (please specify):**

Expects a numeric response (optional)

7.46 rx\_dep\_clo\_0

**Clomipramine (Anafranil)**

Expects a single option response (required)

- No [0]
- Yes [1]
- Don't know [2]

**Branches**

If response Equals 'No [0]' then skip to rx\_dep\_dot\_0 (7.51)

If response Equals 'Don't know [2]' then skip to rx\_dep\_dot\_0 (7.51)

---

7.47 rx\_dep\_clo\_d\_0

**Clomipramine (Anafranil): dose**

Expects a single option response (required)

- 10mg [10]
- 25mg [25]
- 50mg [50]
- 75mg [75]
- 100mg [100]
- 125mg [125]
- 150mg [150]
- other [0]

**Prerequisites**

Skip when rx\_dep\_clo\_d\_0 (7.47) Not Equal 'other [0]'

7.48 rx\_dep\_clo\_d\_other\_0

**Clomipramine (Anafranil): dose, other (please specify):**

Expects a single line text response (optional)

7.49 rx\_dep\_clo\_f\_0

**Clomipramine (Anafranil): number of times per day**

Expects a single option response (required)

- 1 [1]
- 2 [2]
- 3 [3]
- 4 [4]
- other [0]

**Prerequisites**

Skip when rx\_dep\_clo\_f\_0 (7.49) Not Equal 'other [0]'

7.50 rx\_dep\_clo\_f\_other\_0

**Clomipramine (Anafranil): number of times per day, other (please specify):**

Expects a numeric response (optional)

7.51 rx\_dep\_dot\_0

**Dothiepin (Prothiaden, Thaden)**

Expects a single option response (required)

- No [0]
- Yes [1]
- Don't know [2]

**Branches**

If response Equals 'No [0]' then skip to rx\_dep\_mia\_0 (7.56)

If response Equals 'Don't know [2]' then skip to rx\_dep\_mia\_0 (7.56)

---

7.52 rx\_dep\_dot\_d\_0

**Dothiepin (Prothiaden, Thaden): dose**

Expects a single option response (required)

- 10mg [10]
- 25mg [25]
- 50mg [50]
- 75mg [75]
- 100mg [100]
- 125mg [125]
- 150mg [150]
- other [0]

**Prerequisites**

Skip when rx\_dep\_dot\_d\_0 (7.52) Not Equal 'other [0]'

7.53 rx\_dep\_dot\_d\_other\_0

**Dothiepin (Prothiaden, Thaden): dose, other (please specify):**

Expects a single line text response (optional)

7.54 rx\_dep\_dot\_f\_0

**Dothiepin (Prothiaden, Thaden): number of times per day**

Expects a single option response (required)

- 1 [1]
- 2 [2]
- 3 [3]
- 4 [4]
- other [0]

**Prerequisites**

Skip when rx\_dep\_dot\_f\_0 (7.54) Not Equal 'other [0]'

7.55 rx\_dep\_dot\_f\_other\_0

**Dothiepin (Prothiaden, Thaden): number of times per day, other (please specify):**

Expects a numeric response (optional)

7.56 rx\_dep\_mia\_0

**Mianserin (Lantanon)**

Expects a single option response (required)

- No [0]
- Yes [1]
- Don't know [2]

**Branches**

If response Equals 'No [0]' then skip to rx\_dep\_ven\_0 (7.61)

If response Equals 'Don't know [2]' then skip to rx\_dep\_ven\_0 (7.61)

---

7.57 rx\_dep\_mia\_d\_0

**Mianserin (Lantanon): dose**

Expects a single option response (required)

- 10mg [10]
- 30mg [30]
- 60mg [60]
- other [0]

**Prerequisites**

Skip when rx\_dep\_mia\_d\_0 (7.57) Not Equal 'other [0]'

7.58 rx\_dep\_mia\_d\_other\_0

**Mianserin (Lantanon): dose other (please specify):**

Expects a single line text response (optional)

7.59 rx\_dep\_mia\_f\_0

**Mianserin (Lantanon): number of times per day**

Expects a single option response (required)

- 1 [1]
- 2 [2]
- 3 [3]
- 4 [4]
- other [0]

**Prerequisites**

Skip when rx\_dep\_mia\_f\_0 (7.59) Not Equal 'other [0]'

7.60 rx\_dep\_mia\_f\_other\_0

**Mianserin (Lantanon): number of times per day, other (please specify):**

Expects a numeric response (optional)

7.61 rx\_dep\_ven\_0

Venlafaxine (Efexor, Venlor)

Expects a single option response (required)

- No [0]
- Yes [1]
- Don't know [2]

Branches

If response Equals 'No [0]' then skip to rx\_dep\_oth\_0 (7.66)

If response Equals 'Don't know [2]' then skip to rx\_dep\_oth\_0 (7.66)

---

7.62 rx\_dep\_ven\_d\_0

Venlafaxine (Efexor, Venlor): dose

Expects a single option response (required)

- 37.5mg [37.5]
  - 75mg [75]
  - 150mg [150]
  - 225mg [225]
  - 300mg [300]
  - 375mg [375]
  - other [0]
- 

Prerequisites

Skip when rx\_dep\_ven\_d\_0 (7.62) Not Equal 'other [0]'

7.63 rx\_dep\_ven\_d\_other\_0

Venlafaxine (Efexor, Venlor): dose, other (please specify):

Expects a single line text response (required)

7.64 rx\_dep\_ven\_f\_0

Venlafaxine (Efexor, Venlor): number of times per day

Expects a single option response (required)

- 1 [1]
  - 2 [2]
  - 3 [3]
  - 4 [4]
  - other [0]
- 

Prerequisites

Skip when rx\_dep\_ven\_f\_0 (7.64) Not Equal 'other [0]'

7.65 rx\_dep\_ven\_f\_other\_0

Venlafaxine (Efexor, Venlor): number of times per day, other (please specify):

Expects a numeric response (optional)

7.66 rx\_dep\_oth\_0

Other medication for depression: please specify name

Expects a single line text response (optional)



7.67 rx\_dep\_oth\_d\_0

**Other medication for depression: please specify dose**

Expects a single line text response (optional)

---

7.68 rx\_dep\_oth\_f\_0

**Other medication for depression: please specify number of times per day**

Expects a numeric response (optional)

## Section 8. Counselling

### 8.1 rx\_dep\_cou\_instr\_0

We would like to know whether you have received counselling in the last 3 months specifically for your depression. Counselling is not just receiving advice on how to take medication. It means talking with someone in a way that helps you to find solutions to your problems, or receive emotional support.

### 8.2 rx\_dep\_cou\_qread\_0

[Please confirm that the counselling question has been read in full]

Expects a single option response (required)

No [0]

Yes [1]

Branches

If response Equals 'No [0]' then skip to *rx\_dep\_cou\_instr\_0 (8.1)*

### 8.3 rx\_dep\_cou\_qund\_0

Do you understand what we mean by counselling?

Expects a single option response (required)

No [0]

Yes [1]

Branches

If response Equals 'No [0]' then skip to *rx\_dep\_cou\_instr\_0 (8.1)*

### 8.4 rx\_dep\_cou\_instr2\_0

Have you received counselling from any of the following people in the last 3 months specifically for your depression:

### 8.5 rx\_dep\_cou\_n\_0

Have you received counselling from any of the following people in the last 3 months specifically for your depression: Nurse

Expects a single option response (required)

No [0]

Yes [1]

### 8.6 rx\_dep\_cou\_cc\_0

Have you received counselling from any of the following people in the last 3 months specifically for your depression: Clinic counsellor (whether on a one-to-one basis or in a group)

Expects a single option response (required)

No [0]

Yes [1]

### 8.7 rx\_dep\_cou\_s\_0

Have you received counselling from any of the following people in the last 3 months specifically for your depression: Social worker

Expects a single option response (required)

No [0]

Yes [1]

8.8 rx\_dep\_cou\_po\_0

Have you received counselling from any of the following people in the last 3 months specifically for your depression: Psychologist

Expects a single option response (required)

No [0]

Yes [1]

---

8.9 rx\_dep\_cou\_pi\_0

Have you received counselling from any of the following people in the last 3 months specifically for your depression: Psychiatrist (a doctor specialising in mental health)

Expects a single option response (required)

No [0]

Yes [1]

---

8.10 rx\_dep\_cou\_d\_0

Have you received counselling from any of the following people in the last 3 months specifically for your depression: Doctor (other than a psychiatrist)

Expects a single option response (required)

No [0]

Yes [1]

---

8.11 rx\_dep\_cou\_t\_0

Have you received counselling from any of the following people in the last 3 months specifically for your depression: Traditional healer

Expects a single option response (required)

No [0]

Yes [1]

---

8.12 rx\_dep\_cou\_r\_0

Have you received counselling from any of the following people in the last 3 months specifically for your depression: Religious or spiritual advisor

Expects a single option response (required)

No [0]

Yes [1]

---

8.13 rx\_dep\_cou\_ccw\_0

Have you received counselling from any of the following people in the last 3 months specifically for your depression: Community health worker (CCW)

Expects a single option response (required)

No [0]

Yes [1]

---

8.14 rx\_dep\_cou\_o\_0

Have you received counselling from any of the following people in the last 3 months specifically for your depression: Other

Expects a single option response (required)

No [0]

Yes [1]

---

Prerequisites

Skip when *rx\_dep\_cou\_o\_0* (8.14) Equals 'No [0]'

8.15 *rx\_dep\_cou\_ospec\_0*

Please specify

Expects a single line text response (required)

Prerequisites

Skip when *rx\_hiv\_0* (5.20) Equals 'No [0]'

8.16 *rx\_hiv\_instr\_0*

You mentioned earlier you are on ARVs. Please specify which ARVs you are currently taking:

Prerequisites

Skip when *rx\_hiv\_0* (5.20) Equals 'No [0]'

8.17 *rx\_hiv\_fdc\_0*

Please specify which ARVs you are currently taking: FDC (one pill once a day)

Expects a single option response (required)

No [0]

Yes [1]

Branches

If response Equals 'Yes [1]' then skip to *rx\_hiv\_startdate\_0* (8.25)

Prerequisites

Skip when *rx\_hiv\_0* (5.20) Equals 'No [0]'

8.18 *rx\_hiv\_ten\_0*

Please specify which ARVs you are currently taking: Tenofovir

Expects a single option response (required)

No [0]

Yes [1]

Prerequisites

Skip when *rx\_hiv\_0* (5.20) Equals 'No [0]'

8.19 *rx\_hiv\_lam\_0*

Please specify which ARVs you are currently taking: Lamivudine

Expects a single option response (required)

No [0]

Yes [1]

Prerequisites

Skip when *rx\_hiv\_0* (5.20) Equals 'No [0]'

8.20 *rx\_hiv\_stav\_0*

Please specify which ARVs you are currently taking: Stavudine

Expects a single option response (required)

No [0]

Yes [1]

Prerequisites

Skip when *rx\_hiv\_0 (5.20)* Equals 'No [0]'

8.21 *rx\_hiv\_efa\_0*

Please specify which ARVs you are currently taking: Efavirenz

Expects a single option response (required)

No [0]

Yes [1]

Prerequisites

Skip when *rx\_hiv\_0 (5.20)* Equals 'No [0]'

8.22 *rx\_hiv\_zid\_0*

Please specify which ARVs you are currently taking: Zidovudine

Expects a single option response (required)

No [0]

Yes [1]

Prerequisites

Skip when *rx\_hiv\_0 (5.20)* Equals 'No [0]'

8.23 *rx\_hiv\_nev\_0*

Please specify which ARVs you are currently taking: Nevirapine

Expects a single option response (required)

No [0]

Yes [1]

Prerequisites

Skip when *rx\_hiv\_0 (5.20)* Equals 'No [0]'

8.24 *rx\_hiv\_oth\_0*

Please specify which ARVs you are currently taking: Other: please specify

Expects a single line text response (optional)

Prerequisites

Skip when *rx\_hiv\_0 (5.20)* Equals 'No [0]'

8.25 *rx\_hiv\_startdate\_0*

When did you first start taking ARVs?

Expects a single option response (required)

Exact date [0]

Do not know [1]

Month and year known [2]

Branches

If response Equals 'Do not know [1]' then skip to *adh\_vas\_0 (8.29)*

Prerequisites

Skip when *rx\_hiv\_0 (5.20)* Equals 'No [0]' OR  
Skip when *rx\_hiv\_startdate\_0 (8.25)* Not Equal 'Exact date [0]'

8.26 *rx\_hiv\_exactstartdate\_0*

Enter date:

Expects a date response (required)

**Prerequisites**

Skip when *rx\_hiv\_0 (5.20)* Equals 'No [0]' OR  
Skip when *rx\_hiv\_startdate\_0 (8.25)* Not Equal 'Month and year known [2]'

**8.27 rx\_hiv\_startdateyear\_0**

**Enter year:**

Expects a numeric response (required)

**Prerequisites**

Skip when *rx\_hiv\_0 (5.20)* Equals 'No [0]' OR  
Skip when *rx\_hiv\_startdate\_0 (8.25)* Not Equal 'Month and year known [2]'

**8.28 rx\_hiv\_startdatemonth\_0**

**Enter month:**

Expects a numeric response (required)

**Constraints**

Response must be *Less Than or Equal '12'*

**Prerequisites**

Skip when *rx\_hiv\_0 (5.20)* Equals 'No [0]'

**8.29 adh\_vas\_0**

We would be surprised if most people take 100% of their medications. 0% means you have taken no ARVs this past month, 50% means you have taken half of your ARVs this past month, and 100% means you have taken every single dose this past month. What percentage of your ARVs did you take?

Expects a numeric response (required)

**Constraints**

Response must be *Greater Than or Equal '0' AND*

Response must be *Less Than or Equal '100'*

**8.30 clinicfolder\_available\_0**

**[Is the patient's clinic folder available?]**

Expects a single option response (required)

No [0]

Yes [1]

**Prerequisites**

Skip when *rx\_hiv\_0 (5.20)* Equals 'No [0]' OR  
Skip when *clinicfolder\_available\_0 (8.30)* Equals 'No [0]'

**8.31 vl\_date\_0**

**[Please look through the patient's clinic folder now and document the last viral load blood test (date of test and value)]**

Expects a single option response (required)

Available [0]

Unknown [1]

**Prerequisites**

Skip when *rx\_hiv\_0 (5.20)* Equals 'No [0]' OR  
Skip when *vl\_date\_0 (8.31)* Not Equal 'Available [0]' OR  
Skip when *clinicfolder\_available\_0 (8.30)* Equals 'No [0]'

**8.32 vl\_date\_start\_0**

**Enter date:**

Expects a date response (optional)

**Constraints**

Response must be *Less Than or Equal 'DATENOW'*



**Prerequisites**

Skip when *rx\_hiv\_0* (5.20) Equals 'No [0]' OR  
Skip when *vl\_date\_0* (8.31) Equals 'Unknown [1]' OR  
Skip when *clinicfolder\_available\_0* (8.30) Equals 'No [0]'

**8.33 CalcVLReference**

**Numeric**

This field is not displayed on the device, Value: `Set( CalculatedVLReference (1.7) , ROUND( DIVISION OF ( DAYSBETWEEN(Q513605, DATENOW ) ,30) ,2) )`

**Prerequisites**

Skip when *rx\_hiv\_0* (5.20) Equals 'No [0]' OR  
Skip when *vl\_date\_0* (8.31) Equals 'Unknown [1]' OR  
Skip when *clinicfolder\_available\_0* (8.30) Equals 'No [0]'

**8.34 DisplayVLReference**

Number of months since the last viral load test: **CalculatedVLReference (1.7)**

**Prerequisites**

Skip when *rx\_hiv\_0* (5.20) Equals 'No [0]' OR  
Skip when *clinicfolder\_available\_0* (8.30) Equals 'No [0]'

**8.35 vl\_value\_avail\_0**

**Is the viral load DATE and VALUE available?**

Expects a single option response (required)

No [0]

Yes [1]

**Prerequisites**

Skip when *rx\_hiv\_0* (5.20) Equals 'No [0]' OR  
Skip when *clinicfolder\_available\_0* (8.30) Equals 'No [0]' OR  
Skip when *vl\_value\_avail\_0* (8.35) Equals 'No [0]'

**8.36 vl\_value\_0**

[Please look through the patient's clinic folder now and document the VALUE of the last last viral load blood test.]

Expects a single line text response (optional)

**Prerequisites**

Skip when *rx\_hiv\_0* (5.20) Equals 'No [0]' OR  
Skip when *clinicfolder\_available\_0* (8.30) Equals 'No [0]' OR  
Skip when *CalculatedVLReference* (1.7) Less Than '6'

**8.37 set\_vl\_flag\_0**

**Operator**

This field is not displayed on the device, Operator: `Set( ref_vl_0 (1.8) ,1)`

**Prerequisites**

Skip when *rx\_hiv\_0* (5.20) Equals 'No [0]' OR  
Skip when *clinicfolder\_available\_0* (8.30) Equals 'No [0]' OR  
Skip when *vl\_value\_avail\_0* (8.35) Equals 'Yes [1]'

**8.38 set\_vl\_flag\_no\_value\_0**

**Operator**

This field is not displayed on the device, Operator: `Set( ref_vl_0 (1.8) ,1)`

**Prerequisites**

Skip when *rx\_hiv\_0* (5.20) Equals 'No [0]' OR  
Skip when *clinicfolder\_available\_0* (8.30) Equals 'Yes [1]'

**8.39 set\_vl\_ref\_no\_folder\_0**

**Operator**

This field is not displayed on the device, Operator: `Set( ref_vl_0 (1.8) ,1)`

Prerequisites

Skip when *rx\_hiv\_0 (5.20)* Equals 'No [0]' OR  
Skip when *clinicfolder\_available\_0 (8.30)* Equals 'No [0]'

8.40 *vl\_date\_none\_0*

[Please confirm that you have looked through the patient's clinic folder.]

Expects multiple selected options (required)

- Clinic folder checked [1]
- No viral load result found [0]

Prerequisites

Skip when *clinicfolder\_available\_0 (8.30)* Equals 'No [0]'

8.41 *ret\_date\_start\_0*

[Please look through the patient's clinic folder now and document the most recent date of care (clinic note, prescription date, blood result or other)]

Expects a date response (optional)

Constraints

Response must be Less Than or Equal 'DATENOW'

Prerequisites

Skip when *clinicfolder\_available\_0 (8.30)* Equals 'No [0]'

8.42 *ret\_reason\_0*

[Please enter the reason for most recent care.]

Expects multiple selected options (required)

- Nurse or doctor clinic note [Nurse or doctor clinic note]
- Prescription date [Prescription date]
- Blood result [Blood result]
- Other [Other]

Prerequisites

Skip when *ret\_reason\_0 (8.42)* Excludes 'Other [Other]' OR  
Skip when *clinicfolder\_available\_0 (8.30)* Equals 'No [0]'

8.43 *ret\_other\_0*

If other selected, please specify:

Expects a long text response (optional)

8.44 *cig\_0*

We would like to ask you some questions about smoking: Are you currently smoking cigarettes daily?

Expects a single option response (required)

- No [0]
- Yes [1]

Branches

If response Equals 'No [0]' then skip to *bp2\_inst\_0 (8.53)*



8.45 cig\_num\_0

How many cigarettes do you smoke each day (on average)?

Expects a numeric response (required)

Constraints

Response must be Greater Than or Equal '0'

---

Prerequisites

Skip when cig\_num\_0 (8.45) Less Than '61'

8.46 cig\_no\_high\_0

[You have entered an unusually high number. Please confirm or correct it.]

Expects a single option response (required)

Confirmed [0]

Correct it [1]

Branches

If response Equals 'Correct it [1]' then skip to cig\_num\_0 (8.45)

---

Prerequisites

Skip when cig\_num\_0 (8.45) Not Equal '0'

8.47 cig\_num\_zero\_0

[Please confirm that the number of cigarettes smoked each day = 0 or revise the amount smoked in the previous question.]

Expects a single option response (required)

Confirmed [0]

Correct it [1]

Branches

If response Equals 'Correct it [1]' then skip to cig\_num\_0 (8.45)

---

8.48 cig\_start\_0

How old were you when you first started smoking cigarettes?

Expects a numeric response (required)

Prerequisites

Skip when cig\_start\_0 (8.48) Greater Than '11'

8.49 cig\_start\_confirm

[You have entered an unusually low number: please confirm or correct it.]

Expects a single option response (required)

Confirmed [0]

Correct it [1]

Branches

If response Equals 'Correct it [1]' then skip to cig\_start\_0 (8.48)

---

8.50 cig\_quit\_0

In the last year, how many times have you quit smoking for at least 24 hours?

Expects a numeric response (required)

Prerequisites  
Skip when *cig\_quit\_0 (8.50)* Less Than '21'

#### 8.51 cig\_quit\_confirm

[You have entered an unusually high number: please confirm or correct it.]

Expects a single option response (required)

Confirmed [0]

Correct it [1]

Branches

If response Equals 'Correct it [1]' then skip to *cig\_quit\_0 (8.50)*

---

#### 8.52 cig\_think\_0

Are you seriously thinking of quitting smoking. Choose one of the following options:

Expects a single option response (required)

Yes, within the next 30 days [0]

Yes, within the next 6 months [1]

No, not thinking of quitting [2]

---

#### 8.53 bp2\_inst\_0

I am now going to take your second blood pressure reading.

---

#### 8.54 sbp2\_0

[Systolic blood pressure, second reading]

Expects a numeric response (required)

Prerequisites  
Skip when *sbp2\_0 (8.54)* Less Than '201'

#### 8.55 sbp2\_high\_0

[You have entered an unusually high number. Please confirm or correct it.]

Expects a single option response (required)

Confirmed [0]

Correct it [1]

Branches

If response Equals 'Correct it [1]' then skip to *sbp2\_0 (8.54)*

---

Prerequisites  
Skip when *sbp2\_0 (8.54)* Greater Than '89'

#### 8.56 sbp2\_low\_confirm

[You have entered an unusually low number: please confirm or correct it.]

Expects a single option response (required)

Confirmed [0]

Correct it [1]

Branches

If response Equals 'Correct it [1]' then skip to *sbp2\_0 (8.54)*

---

8.57 dbp2\_0

[Diastolic blood pressure, second reading]

Expects a numeric response (required)

Constraints

Response must be Less Than or Equal 'sbp2\_0 (8.54)'

Branches

If response Less Than 'sbp2\_0 (8.54)' then skip to *anx\_instr\_0 (8.59)*

---

8.58 dbp2moresbp2\_0

The systolic blood pressure must be larger than the diastolic blood pressure. [Please correct the blood pressure readings.]

Expects a single option response (required)

Correct it [0]

Branches

If response Equals 'Correct it [0]' then skip to *sbp2\_0 (8.54)*

---

8.59 anx\_instr\_0

The following questions ask you about your feelings and thoughts during the last month. In each case, you will be asked to indicate how often you felt or thought a certain way.

---

8.60 anx1\_0

In the last month, how often have you been upset because of something that happened unexpectedly?

Expects a single option response (required)

Never [0]

Almost Never [1]

Sometimes [2]

Fairly Often [3]

Very Often [4]

---

8.61 anx2\_0

In the last month, how often have you felt that you were unable to control the important things in your life?

Expects a single option response (required)

Never [0]

Almost Never [1]

Sometimes [2]

Fairly Often [3]

Very Often [4]

---

8.62 anx3\_0

In the last month, how often have you felt nervous and stressed?

Expects a single option response (required)

Never [0]

Almost Never [1]

Sometimes [2]

Fairly Often [3]

Very Often [4]

---

8.63 anx4\_0

In the last month, how often have you felt confident about your ability to handle your personal problems?

Expects a single option response (required)

- Never [0]
  - Almost Never [1]
  - Sometimes [2]
  - Fairly Often [3]
  - Very Often [4]
- 

8.64 anx5\_0

In the last month, how often have you felt that things were going your way?

Expects a single option response (required)

- Never [0]
  - Almost Never [1]
  - Sometimes [2]
  - Fairly Often [3]
  - Very Often [4]
- 

8.65 anx6\_0

In the last month, how often have you found that you could not cope with all the things that you had to do?

Expects a single option response (required)

- Never [0]
  - Almost Never [1]
  - Sometimes [2]
  - Fairly Often [3]
  - Very Often [4]
- 

8.66 anx7\_0

In the last month, how often have you been able to control irritations in your life?

Expects a single option response (required)

- Never [0]
  - Almost Never [1]
  - Sometimes [2]
  - Fairly Often [3]
  - Very Often [4]
- 

8.67 anx8\_0

In the last month, how often have you felt that you were on top of things?

Expects a single option response (required)

- Never [0]
  - Almost Never [1]
  - Sometimes [2]
  - Fairly Often [3]
  - Very Often [4]
-

8.68 anx9\_0

In the last month, how often have you been angered because of things that were outside of your control?

Expects a single option response (required)

- Never [0]
  - Almost Never [1]
  - Sometimes [2]
  - Fairly Often [3]
  - Very Often [4]
- 

8.69 anx10\_0

In the last month, how often have you felt difficulties were piling up so high that you could not overcome them?

Expects a single option response (required)

- Never [0]
  - Almost Never [1]
  - Sometimes [2]
  - Fairly Often [3]
  - Very Often [4]
- 

8.70 whodas\_instr\_0

The following questions ask about difficulties you may have had in the past month.

---

8.71 whodas1\_0

In the past 30 days, how much difficulty did you have in: Standing for long periods such as 30 minutes?

Expects a single option response (required)

- None [1]
  - Mild [2]
  - Moderate [3]
  - Severe [4]
  - Extreme or cannot do [5]
- 

8.72 whodas2\_0

In the past 30 days, how much difficulty did you have in: Taking care of your household responsibilities?

Expects a single option response (required)

- None [1]
  - Mild [2]
  - Moderate [3]
  - Severe [4]
  - Extreme or cannot do [5]
-

8.73 whodas3\_0

In the past 30 days, how much difficulty did you have in: Learning a new task, for example, learning how to get to a new place?

Expects a single option response (required)

- None [1]
  - Mild [2]
  - Moderate [3]
  - Severe [4]
  - Extreme or cannot do [5]
- 

8.74 whodas4\_0

In the past 30 days, how much difficulty did you have in: Joining in community activities (for example, festivities, religious or other activities) in the same way as anyone else can?

Expects a single option response (required)

- None [1]
  - Mild [2]
  - Moderate [3]
  - Severe [4]
  - Extreme or cannot do [5]
- 

8.75 whodas5\_0

In the past 30 days, how much have you been emotionally affected by your health problems?

Expects a single option response (required)

- None [1]
  - Mild [2]
  - Moderate [3]
  - Severe [4]
  - Extreme or cannot do [5]
- 

8.76 whodas6\_0

In the past 30 days, how much difficulty did you have in: Concentrating on doing something for ten minutes?

Expects a single option response (required)

- None [1]
  - Mild [2]
  - Moderate [3]
  - Severe [4]
  - Extreme or cannot do [5]
- 

8.77 whodas7\_0

In the past 30 days, how much difficulty did you have in: Walking a long distance such as a kilometre (or equivalent)?

Expects a single option response (required)

- None [1]
  - Mild [2]
  - Moderate [3]
  - Severe [4]
  - Extreme or cannot do [5]
-



8.78 whodas8\_0

In the past 30 days, how much difficulty did you have in: Washing your whole body?

Expects a single option response (required)

- None [1]
  - Mild [2]
  - Moderate [3]
  - Severe [4]
  - Extreme or cannot do [5]
- 

8.79 whodas9\_0

In the past 30 days, how much difficulty did you have in: Getting dressed?

Expects a single option response (required)

- None [1]
  - Mild [2]
  - Moderate [3]
  - Severe [4]
  - Extreme or cannot do [5]
- 

8.80 whodas10\_0

In the past 30 days, how much difficulty did you have in: Dealing with people you do not know?

Expects a single option response (required)

- None [1]
  - Mild [2]
  - Moderate [3]
  - Severe [4]
  - Extreme or cannot do [5]
- 

8.81 whodas11\_0

In the past 30 days, how much difficulty did you have in: Maintaining a friendship?

Expects a single option response (required)

- None [1]
  - Mild [2]
  - Moderate [3]
  - Severe [4]
  - Extreme or cannot do [5]
- 

8.82 whodas12\_0

In the past 30 days, how much difficulty did you have in: Your day-to-day work/school?

Expects a single option response (required)

- None [1]
  - Mild [2]
  - Moderate [3]
  - Severe [4]
  - Extreme or cannot do [5]
-

8.83 whodas13\_0

Overall, in the past 30 days, how many days were these difficulties present?

Expects a numeric response (required)

Constraints

Response must be Greater Than or Equal '0' AND

Response must be Less Than or Equal '30'

---

8.84 whodas14\_0

In the past 30 days, for how many days were you totally unable to carry out your usual activities or work because of any health condition?

Expects a numeric response (required)

Constraints

Response must be Greater Than or Equal '0' AND

Response must be Less Than or Equal '30'

---

8.85 whodas15\_0

In the past 30 days, not counting the days that you were totally unable, for how many days did you cut back or reduce your usual activities or work because of any health condition?

Expects a numeric response (required)

Constraints

Response must be Greater Than or Equal '0' AND

Response must be Less Than or Equal '30'

---

8.86 bp3\_instr\_0

I am now going to take your third blood pressure reading, height, weight and waist measurements.

---

8.87 sbp3\_0

[Systolic blood pressure, third reading]

Expects a numeric response (required)

Prerequisites

Skip when sbp3\_0 (8.87) Less Than '201'

---

8.88 sbp3\_high\_0

[You have entered an unusually high number. Please confirm or correct it.]

Expects a single option response (required)

Confirmed [0]

Correct it [1]

Branches

If response Equals 'Correct it [1]' then skip to sbp3\_0 (8.87)

---



Prerequisites  
Skip when *sbp3\_0 (8.87)* Greater Than '89'

#### 8.89 sbp3\_low\_confirm

[You have entered an unusually low number; please confirm or correct it.]

Expects a single option response (required)

Confirmed [0]

Correct it [1]

Branches

If response Equals 'Correct it [1]' then skip to *sbp3\_0 (8.87)*

---

#### 8.90 dbp3\_0

[Diastolic blood pressure, third reading]

Expects a numeric response (required)

Branches

If response Less Than '*sbp3\_0 (8.87)*' then skip to *mean\_sbp\_0 (8.92)*

---

#### 8.91 dbp3moresbp3\_0

The systolic blood pressure must be larger than the diastolic blood pressure. [Please correct the blood pressure readings.]

Expects a single option response (required)

Correct it [0]

Branches

If response Equals 'Correct it [0]' then skip to *sbp3\_0 (8.87)*

---

#### 8.92 mean\_sbp\_0

Numeric

This field is not displayed on the device, Value: 0

---

#### 8.93 set\_meandbp\_0

Numeric

This field is not displayed on the device, Value: 0

---

#### 8.94 set\_mean\_sbp\_0

Operator

This field is not displayed on the device, Operator: `__{SET(513995, __{AVG( sbp2_0 (8.54), sbp3_0 (8.87) )})}__`

---

#### 8.95 set\_mean\_dbp\_0

Operator

This field is not displayed on the device, Operator: `__{SET(513996, __{AVG( dbp2_0 (8.57), dbp3_0 (8.90) )})}__`

---

Prerequisites  
Skip when *meansbp\_0 (1.3)* Less Than '180' AND  
Skip when *meandbp\_0 (1.4)* Less Than '110'

#### 8.96 set\_bp\_flag\_0

Operator

This field is not displayed on the device, Operator: `Set( ref_bp_0 (1.9), 1)`

---

8.97 height\_0

[Enter height in cm to one decimal place]

Expects a decimal response (required)

Constraints

Response must be Greater Than '0'

---

Prerequisites

Skip when height\_0 (8.97) Less Than '185'

8.98 height\_high\_0

[You have entered an unusually high number. Please confirm or correct it.]

Expects a single option response (required)

Confirmed [0]

Correct it [1]

Branches

If response Equals 'Correct it [1]' then skip to height\_0 (8.97)

---

Prerequisites

Skip when height\_0 (8.97) Greater Than '144'

8.99 height\_low\_confirm

[You have entered an unusually low number: please confirm or correct it.]

Expects a single option response (required)

Confirmed [0]

Correct it [1]

Branches

If response Equals 'Correct it [1]' then skip to height\_0 (8.97)

---

8.100 weight\_0

[Enter weight in kg to one decimal place]

Expects a decimal response (required)

Constraints

Response must be Greater Than '0'

---

Prerequisites

Skip when weight\_0 (8.100) Less Than '136'

8.101 weight\_high\_0

[You have entered an unusually high number. Please confirm or correct it.]

Expects a single option response (required)

Confirmed [0]

Correct it [1]

Branches

If response Equals 'Correct it [1]' then skip to weight\_0 (8.100)

---

Prerequisites  
Skip when *weight\_0 (8.100)* Greater Than '49'

#### 8.102 *weight\_low\_confirm*

[You have entered an unusually low number; please confirm or correct it.]

Expects a single option response (required)

Confirmed [0]

Correct it [1]

Branches

If response Equals 'Correct it [1]' then skip to *weight\_0 (8.100)*

---

#### 8.103 *height\_m\_0*

Numeric

This field is not displayed on the device

---

#### 8.104 *set\_height\_m\_0*

Operator

This field is not displayed on the device, Operator: `__{SET(538870,__{DIV(height_0 (8.97),100)}__)}__`

---

#### 8.105 *height\_2\_0*

Numeric

This field is not displayed on the device

---

#### 8.106 *set\_height\_2\_0*

Operator

This field is not displayed on the device, Operator: `__{SET(538874,__{MUL(height_m_0 (8.103),height_m_0 (8.103))}__)}__`

---

#### 8.107 *bmi\_ur\_0*

Numeric

This field is not displayed on the device

---

#### 8.108 *set\_bmi\_ur\_0*

Operator

This field is not displayed on the device, Operator: `__{SET(538878,__{DIV(weight_0 (8.100),height_2_0 (8.105))}__)}__`

---

#### 8.109 *bmi\_set\_0*

Operator

This field is not displayed on the device, Operator: `__{SET(528069,__{ROUND(bmi_ur_0 (8.107),2)}__)}__`

---

#### 8.110 *waist\_0*

[Enter waist in cm (no decimal place)]

Expects a numeric response (required)

Prerequisites  
Skip when *waist\_0* (8.110) Less Than '136'

8.111 **waist\_high\_0**

[You have entered an unusually high number. Please confirm or correct it.]

Expects a single option response (required)

Confirmed [0]

Correct it [1]

Branches

If response Equals 'Correct it [1]' then skip to *waist\_0* (8.110)

---

Prerequisites  
Skip when *waist\_0* (8.110) Greater Than '64'

8.112 **waist\_low\_confirm\_0**

[You have entered an unusually low number; please confirm or correct it.]

Expects a single option response (required)

Confirmed [0]

Correct it [1]

Branches

If response Equals 'Correct it [1]' then skip to *waist\_0* (8.110)

---

Prerequisites  
Skip when *rx\_hiv\_0* (5.20) Equals 'No [0]'

8.113 **stigma\_instr\_0**

We would like to understand how having HIV makes you feel. Please answer whether you agree or disagree with the following statements.

---

Prerequisites  
Skip when *rx\_hiv\_0* (5.20) Equals 'No [0]'

8.114 **stigma1\_0**

It is difficult to tell people about my HIV infection

Expects a single option response (required)

Agree [1]

Disagree [0]

---

Prerequisites  
Skip when *rx\_hiv\_0* (5.20) Equals 'No [0]'

8.115 **stigma2\_0**

Being HIV positive makes me feel dirty

Expects a single option response (required)

Agree [1]

Disagree [0]

---

Prerequisites  
Skip when *rx\_hiv\_0* (5.20) Equals 'No [0]'

8.116 **stigma3\_0**

I feel guilty that I am HIV positive

Expects a single option response (required)

Agree [1]

Disagree [0]

---

Prerequisites  
Skip when *rx\_hiv\_0* (5.20) Equals 'No [0]'

8.117 stigma4\_0

I am ashamed that I am HIV positive

Expects a single option response (required)

- Agree [1]
  - Disagree [0]
- 

Prerequisites  
Skip when *rx\_hiv\_0* (5.20) Equals 'No [0]'

8.118 stigma5\_0

I sometimes feel worthless because I am HIV positive

Expects a single option response (required)

- Agree [1]
  - Disagree [0]
- 

Prerequisites  
Skip when *rx\_hiv\_0* (5.20) Equals 'No [0]'

8.119 stigma6\_0

I hide my HIV status from others

Expects a single option response (required)

- Agree [1]
  - Disagree [0]
- 

8.120 gen\_instr\_0

We would now like to ask some general questions

---

8.121 race\_0

How would you describe your ethnicity?

Expects a single option response (required)

- Black [0]
  - White [1]
  - Coloured [2]
  - Indian [3]
  - Other [4]
  - Prefer not to say [6]
- 

8.122 mstatus\_0

What is your marital status?

Expects a single option response (required)

- Single [0]
  - Married or living with a partner [1]
  - Divorced [2]
  - Separated [3]
  - Widowed [4]
-

8.123 edu\_0

What is the highest level of education you have completed?

Expects a single option response (required)

- Never went to school [0]
- Grade 1-7 (primary school) [1]
- Grade 8-12 (high school) [2]
- Tertiary/diploma [3]

8.124 clinic\_instr\_0

We would like to know how much money your health costs you. In order to do this we need to ask some questions about your use of health care services, your employment status and income. We would like to remind you that all the information you give us is confidential.

8.125 clinic\_trans\_0

How do you usually travel to this clinic (choose one of the following options)?

Expects a single option response (required)

- Walk [0]
- Taxi [1]
- Private motor vehicle (such as car) [2]
- Bus [3]
- Patient transport/ambulance [4]
- Bicycle [5]
- Other [6]

Prerequisites

Skip when *clinic\_trans\_0* (8.125) Not Equal 'Other [6]'

8.126 clinic\_trans\_other\_0

Please specify:

Expects a long text response (required)

Prerequisites

Skip when *clinic\_trans\_0* (8.125) Equals 'Walk [0]' OR

Skip when *clinic\_trans\_0* (8.125) Equals 'Taxi [1]' OR

Skip when *clinic\_trans\_0* (8.125) Equals 'Bus [3]' OR

Skip when *clinic\_trans\_0* (8.125) Equals 'Patient transport/ambulance [4]' OR

Skip when *clinic\_trans\_0* (8.125) Equals 'Bicycle [5]'

8.127 clinic\_dist\_0

What was the distance travelled to the clinic (in km one way)?

Expects a numeric response (required)

**Prerequisites**

Skip when *clinic\_dist\_0 (8.127)* Less Than '51' OR  
Skip when *clinic\_trans\_0 (8.125)* Equals 'Walk [0]' OR  
Skip when *clinic\_trans\_0 (8.125)* Equals 'Taxi [1]' OR  
Skip when *clinic\_trans\_0 (8.125)* Equals 'Bus [3]' OR  
Skip when *clinic\_trans\_0 (8.125)* Equals 'Patient transport/ambulance [4]' OR  
Skip when *clinic\_trans\_0 (8.125)* Equals 'Bicycle [5]'

**8.128 clinic\_dist\_high\_0**

[You have entered an unusually high number. Please confirm or correct it.]

Expects a single option response (required)

Confirmed [0]

Correct it [1]

**Branches**

If response Equals 'Correct it [1]' then skip to *clinic\_dist\_0 (8.127)*

---

**Prerequisites**

Skip when *clinic\_trans\_0 (8.125)* Equals 'Walk [0]' OR  
Skip when *clinic\_trans\_0 (8.125)* Equals 'Private motor vehicle (such as car) [2]' OR  
Skip when *clinic\_trans\_0 (8.125)* Equals 'Patient transport/ambulance [4]' OR  
Skip when *clinic\_trans\_0 (8.125)* Equals 'Bicycle [5]'

**8.129 clinic\_fare\_0**

Do you usually pay a transport fare?

Expects a single option response (required)

No [0]

Yes [1]

---

**Prerequisites**

Skip when *clinic\_fare\_0 (8.129)* Equals 'No [0]' OR  
Skip when *clinic\_trans\_0 (8.125)* Equals 'Walk [0]' OR  
Skip when *clinic\_trans\_0 (8.125)* Equals 'Private motor vehicle (such as car) [2]' OR  
Skip when *clinic\_trans\_0 (8.125)* Equals 'Patient transport/ambulance [4]' OR  
Skip when *clinic\_trans\_0 (8.125)* Equals 'Bicycle [5]'

**8.130 clinic\_fare\_amount\_0**

How much do you pay for a return fare?

Expects a decimal response (required)

**Prerequisites**

Skip when *clinic\_fare\_0 (8.129)* Equals 'No [0]' OR  
Skip when *clinic\_trans\_0 (8.125)* Equals 'Walk [0]' OR  
Skip when *clinic\_trans\_0 (8.125)* Equals 'Private motor vehicle (such as car) [2]' OR  
Skip when *clinic\_trans\_0 (8.125)* Equals 'Patient transport/ambulance [4]' OR  
Skip when *clinic\_trans\_0 (8.125)* Equals 'Bicycle [5]' OR  
Skip when *clinic\_fare\_amount\_0 (8.130)* Less Than '51'

**8.131 clinic\_fare\_high\_0**

[You have entered an unusually high number. Please confirm or correct it.]

Expects a single option response (required)

Confirmed [0]

Correct it [1]

**Branches**

If response Equals 'Correct it [1]' then skip to *clinic\_fare\_amount\_0 (8.130)*

---

**8.132 clinic\_visits\_0**

Aside from today, have you visited this clinic in the last 3 months for your own health care?

Expects a single option response (required)

No [0]

Yes [1]

---



Prerequisites

Skip when *clinic\_visits\_0* (8.132) Equals 'No [0]'

8.133 *clinic\_visits\_num\_0*

How many times have you visited this clinic in the last 3 months (excluding today) for your own health care?

Expects a numeric response (required)

Prerequisites

Skip when *clinic\_visits\_0* (8.132) Equals 'No [0]' OR

Skip when *clinic\_visits\_num\_0* (8.133) Less Than '13'

8.134 *clinic\_visits\_num\_high\_0*

[You have entered an unusually high number. Please confirm or correct it.]

Expects a single option response (required)

Confirmed [0]

Correct it [1]

Branches

If response Equals 'Correct it [1]' then skip to *clinic\_visits\_num\_0* (8.133)

8.135 *hcp\_0*

Have you visited any other health care provider in the last 3 months for your own health care?

Expects a single option response (required)

No [0]

Yes [1]

Branches

If response Equals 'No [0]' then skip to *hosp\_3mnt\_0* (11.1)

8.136 *hcp\_list\_0*

Please indicate which of the following health care providers you have visited in the last 3 months for your own health care. I will also ask you some more details about those visits.

Expects multiple selected options (required)

Another clinic [0]

Hospital (outpatient visits only) [1]

General Practitioner [2]

Private Pharmacy [3]

Traditional healer/ herbalist [4]

Other [5]

Prerequisites

Skip when *hcp\_list\_0* (8.136) Excludes 'Other [5]'

8.137 *hcp\_other\_0*

Please state which other health care provider you visited in the last 3 months for your own health care

Expects a long text response (required)

## Section 9. Health Care Setup

### 9.1 hcp\_count\_0

#### Numeric

This field is not displayed on the device

---

### 9.2 hcp\_count\_setter\_0

#### Operator

This field is not displayed on the device, Operator: `__{SET(514041, Count( hcp_list_0 (8.136) ) )}__`

---

### 9.3 hcp\_count\_reprocess\_0

#### Operator

This field is not displayed on the device, Operator: `Reprocess( hcp_count_0 (9.1) )`

---

#### Prerequisites

Skip when *hcp\_count\_0 (9.1)* Greater Than '-1'

### 9.4 hcp\_list\_loop\_0

This is a helper question for the repeat and is never shown

Expects a single option response (optional)

---

### 9.5 hcp\_list\_loop\_clear\_0

#### Operator

This field is not displayed on the device, Operator: `REMOVEOPTION(,524021)`

---

#### Prerequisites

Skip when *hcp\_list\_0 (8.136)* Excludes 'Another clinic [0]'

### 9.6 hcp\_list\_loop\_addclinic\_0

#### Operator

This field is not displayed on the device, Operator: `ADDOPTION(ANOTHER CLINIC,ANOTHER CLINIC,524021)`

---

#### Prerequisites

Skip when *hcp\_list\_0 (8.136)* Excludes 'Hospital (outpatient visits only) [1]'

### 9.7 hcp\_list\_loop\_addhospital\_0

#### Operator

This field is not displayed on the device, Operator: `ADDOPTION(HOSPITAL,HOSPITAL,524021)`

---

#### Prerequisites

Skip when *hcp\_list\_0 (8.136)* Excludes 'General Practitioner [2]'

### 9.8 hcp\_list\_loop\_addgp\_0

#### Operator

This field is not displayed on the device, Operator: `ADDOPTION(GENERAL PRACTITIONER,GENERAL PRACTITIONER,524021)`

---

**Prerequisites**

Skip when *hcp\_list\_0 (8.136)* Excludes 'Private Pharmacy [3]'

**9.9 hcp\_list\_loop\_addpharmacy\_0**

**Operator**

This field is not displayed on the device, Operator: `ADDOPTION(PRIVATE PHARMACY,PRIVATE PHARMACY,524021)`

---

**Prerequisites**

Skip when *hcp\_list\_0 (8.136)* Excludes 'Traditional healer/ herbalist [4]'

**9.10 hcp\_list\_loop\_addhealer\_0**

**Operator**

This field is not displayed on the device, Operator: `ADDOPTION(TRADITIONAL HEALER,TRADITIONAL HEALER,524021)`

---

**Prerequisites**

Skip when *hcp\_list\_0 (8.136)* Excludes 'Other [5]'

**9.11 hcp\_list\_loop\_addother\_0**

**Operator**

This field is not displayed on the device, Operator: `__{ADDOPTION(hcp_other_0 (8.137), hcp_other_0 (8.137),524021)}__`

---

Repeat this section for value of *hcp\_count\_0* (9.1)

## Section 10. Health Care Provider

### 10.1 hcp\_name\_0

Text

This field is not displayed on the device, Value: Unknown

---

### 10.2 hcp\_name\_set\_0

Operator

This field is not displayed on the device, Operator: `__{SET(524916, OptionValue( hcp_list_loop_0 (9.4) ,REPEAT IDX) )}__`

---

### 10.3 hcp\_instruction\_0

The following questions are about your visits to **hcp\_name\_0** (10.1)

---

### 10.4 hcp\_num\_0

Number of visits in the last 3 months

Expects a numeric response (required)

Prerequisites

Skip when *hcp\_num\_0* (10.4) Less Than '13'

### 10.5 hcp\_num\_high\_0

[You have entered an unusually high number. Please confirm or correct it.]

Expects a single option response (required)

Confirmed [0]

Correct it [1]

Branches

If response Equals 'Correct it [1]' then skip to *hcp\_num\_0* (10.4)

---

### 10.6 hcp\_fee\_0

Did you pay a fee on your last visit?

Expects a single option response (required)

No [0]

Yes [1]

---

Prerequisites

Skip when *hcp\_fee\_0* (10.6) Equals 'No [0]'

### 10.7 hcp\_feeamt\_0

What was the fee in rands?

Expects a decimal response (required)

**Prerequisites**

Skip when *hcp\_feeamt\_0 (10.7)* Less Than '151' OR  
Skip when *hcp\_fee\_0 (10.6)* Equals 'No [0]'

**10.8 hcp\_feeamt\_high\_0**

[You have entered an unusually high number. Please confirm or correct it.]

Expects a single option response (required)

- Confirmed [0]
- Correct it [1]

**Branches**

If response Equals 'Correct it [1]' then skip to *hcp\_feeamt\_0 (10.7)*

---

**10.9 hcp\_tra\_0**

What transport did you use to travel to your last visit to this provider?

Expects a single option response (required)

- Walk [0]
  - Taxi [1]
  - Private motor vehicle (such as car) [2]
  - Bus [3]
  - Patient transport/ambulance [4]
  - Other [6]
- 

**Prerequisites**

Skip when *hcp\_tra\_0 (10.9)* Not Equal 'Other [6]'

**10.10 hcp\_oth\_tra\_spec\_0**

Please specify

Expects a long text response (required)

**Prerequisites**

Skip when *hcp\_tra\_0 (10.9)* Equals 'Walk [0]' OR  
Skip when *hcp\_tra\_0 (10.9)* Equals 'Taxi [1]' OR  
Skip when *hcp\_tra\_0 (10.9)* Equals 'Bus [3]' OR  
Skip when *hcp\_tra\_0 (10.9)* Equals 'Patient transport/ambulance [4]'

**10.11 hcp\_dis\_0**

What was the distance travelled to the clinic (in km one way)?

Expects a numeric response (required)

**Prerequisites**

Skip when *hcp\_dis\_0 (10.11)* Less Than '51' OR  
Skip when *hcp\_tra\_0 (10.9)* Equals 'Walk [0]' OR  
Skip when *hcp\_tra\_0 (10.9)* Equals 'Taxi [1]' OR  
Skip when *hcp\_tra\_0 (10.9)* Equals 'Bus [3]' OR  
Skip when *hcp\_tra\_0 (10.9)* Equals 'Patient transport/ambulance [4]'

**10.12 hcp\_travamt\_high\_0**

[You have entered an unusually high number. Please confirm or correct it.]

Expects a single option response (required)

- Confirmed [0]
- Correct it [1]

**Branches**

If response Equals 'Correct it [1]' then skip to *hcp\_dis\_0 (10.11)*

---

**Prerequisites**

Skip when *hcp\_tra\_0 (10.9)* Equals 'Walk [0]' OR  
Skip when *hcp\_tra\_0 (10.9)* Equals 'Private motor vehicle (such as car) [2]' OR  
Skip when *hcp\_tra\_0 (10.9)* Equals 'Patient transport/ambulance [4]'

**10.13 hcp\_fare\_0**

**Did you pay a transport fare on your last visit?**

Expects a single option response (required)

No [0]

Yes [1]

**Prerequisites**

Skip when *hcp\_tra\_0 (10.9)* Equals 'Walk [0]' OR  
Skip when *hcp\_tra\_0 (10.9)* Equals 'Private motor vehicle (such as car) [2]' OR  
Skip when *hcp\_tra\_0 (10.9)* Equals 'Patient transport/ambulance [4]' OR  
Skip when *hcp\_fare\_0 (10.13)* Equals 'No [0]'

**10.14 hcp\_\_fareamt\_0**

**What was the return fare in rands?**

Expects a decimal response (required)

**Prerequisites**

Skip when *hcp\_\_fareamt\_0 (10.14)* Less Than '51' OR  
Skip when *hcp\_tra\_0 (10.9)* Equals 'Walk [0]' OR  
Skip when *hcp\_tra\_0 (10.9)* Equals 'Private motor vehicle (such as car) [2]' OR  
Skip when *hcp\_tra\_0 (10.9)* Equals 'Patient transport/ambulance [4]'

**10.15 hcp\_feeamt\_high2\_0**

**[You have entered an unusually high number. Please confirm or correct it.]**

Expects a single option response (required)

Confirmed [0]

Correct it [1]

**Branches**

If response Equals 'Correct it [1]' then skip to *hcp\_\_fareamt\_0 (10.14)*

## Section 11. Hospital

### 11.1 hosp\_3mnt\_0

Have you been admitted to hospital in the last 3 months?

Expects a single option response (required)

No [0]

Yes [1]

Branches

If response Equals 'No [0]' then skip to *job\_0 (13.1)*

---

Prerequisites

Skip when *hosp\_3mnt\_0 (11.1)* Equals 'No [0]'

### 11.2 hosp\_num\_0

How many times have you been admitted to hospital in the last 3 months?

Expects a numeric response (required)

Prerequisites

Skip when *hosp\_num\_0 (11.2)* Less Than '13'

### 11.3 hosp\_num\_high\_0

[You have entered an unusually high number. Please confirm or correct it.]

Expects a single option response (required)

Confirmed [0]

Correct it [1]

Branches

If response Equals 'Correct it [1]' then skip to *hosp\_num\_0 (11.2)*

---

Prerequisites

Skip when *hosp\_num\_0 (11.2)* Equals '0'

### 11.4 admission\_instr\_0

I would like to ask you a few questions about each of your admissions in the last 3 months:

---



Repeat this section for value of *hosp\_num\_0 (11.2)*

## Section 12. Admission

### 12.1 hosp\_date\_0

Admission **REPEAT IDX**: when were you admitted?

Expects a date response (optional)

#### Constraints

Response must be Less Than 'DATENOW'

---

### 12.2 set\_hosp\_date\_check\_0

Operator

This field is not displayed on the device, Operator: \_\_{SET(525620, \_\_{DAYSBETWEEN( hosp\_date\_0 (12.1), DATENOW )}\_\_)}\_\_

---

### 12.3 hosp\_date\_check\_0

Numeric

This field is not displayed on the device, Value: 0

---

#### Prerequisites

Skip when *hosp\_date\_check\_0 (12.3)* Less Than '93'

### 12.4 hosp\_date\_check\_fb\_0

[The date entered is more than 3 months ago. Please correct it.]

Expects a single option response (required)

Correct it [0]

#### Branches

If response Equals 'Correct it [0]' then skip to *hosp\_date\_0 (12.1)*

---

### 12.5 hosp\_nights\_0

Admission **REPEAT IDX**: how many nights did you spend in hospital?

Expects a numeric response (optional)

#### Prerequisites

Skip when *hosp\_nights\_0 (12.5)* Less Than '31'

### 12.6 hosp\_nights\_high\_0

[You have entered an unusually high number. Please confirm or correct it.]

Expects a single option response (required)

Confirmed [0]

Correct it [1]

#### Branches

If response Equals 'Correct it [1]' then skip to *hosp\_nights\_0 (12.5)*

---

12.7 hosp\_name\_0

Admission **REPEAT IDX**: What was the name of the hospital?

Expects a single option response (optional)

- Klerksdorp (Tshepong A) [Klerksdorp (Tshepong A)]
- Potchefstroom [Potchefstroom]
- Nic Bodenstein [Nic Bodenstein]
- Ventersdorp [Ventersdorp]
- Witrand [Witrand]
- Other (please specify) [Other (please specify)]

Prerequisites

Skip when *hosp\_name\_0 (12.7)* Not Equal 'Other (please specify) [Other (please specify)]'

12.8 hosp\_name\_other\_0

Admission **REPEAT IDX**: please specify the hospital name

Expects a single line text response (required)

12.9 hosp\_exp\_0

Admission **REPEAT IDX**: What was the total amount you had to pay for your admission (your out-of-pocket expenses)?

Expects a decimal response (required)

Prerequisites

Skip when *hosp\_exp\_0 (12.9)* Less Than '151'

12.10 hosp\_exp\_high\_0

[You have entered an unusually high number. Please confirm or correct it.]

Expects a single option response (required)

- Confirmed [0]
- Correct it [1]

Branches

If response Equals 'Correct it [1]' then skip to *hosp\_exp\_0 (12.9)*

12.11 hosp\_trans\_0

Admission **REPEAT IDX**: How did you travel to the hospital (choose one of the following options):

Expects a single option response (required)

- Walk [0]
- Taxi [1]
- Private motor vehicle (such as car) [2]
- Bus [3]
- Patient transport/ambulance [4]
- Bicycle [5]
- Other [6]

Prerequisites

Skip when *hosp\_trans\_0 (12.11)* Not Equal 'Other [6]'

12.12 *hosp\_trans\_other\_0*

Admission **REPEAT IDX**: please specify

Expects a long text response (required)

Prerequisites

Skip when *hosp\_trans\_0 (12.11)* Equals 'Walk [0]' OR

Skip when *hosp\_trans\_0 (12.11)* Equals 'Taxi [1]' OR

Skip when *hosp\_trans\_0 (12.11)* Equals 'Bus [3]' OR

Skip when *hosp\_trans\_0 (12.11)* Equals 'Patient transport/ambulance [4]' OR

Skip when *hosp\_trans\_0 (12.11)* Equals 'Bicycle [5]'

12.13 *hosp\_dist\_0*

Admission **REPEAT IDX**: what was the distance travelled to the hospital (in km one way) ?

Expects a numeric response (required)

Prerequisites

Skip when *hosp\_dist\_0 (12.13)* Less Than '51' OR

Skip when *hosp\_trans\_0 (12.11)* Not Equal 'Private motor vehicle (such as car) [2]' OR

Skip when *hosp\_trans\_0 (12.11)* Not Equal 'Other [6]'

12.14 *hosp\_dist\_high\_0*

[You have entered an unusually high number. Please confirm or correct it.]

Expects a single option response (required)

Confirmed [0]

Correct it [1]

Branches

If response Equals 'Correct it [1]' then skip to *hosp\_dist\_0 (12.13)*

12.15 *hosp\_fare\_0*

Admission **REPEAT IDX**: Did you pay a transport fare to the hospital?

Expects a single option response (required)

No [0]

Yes [1]

Prerequisites

Skip when *hosp\_fare\_0 (12.15)* Equals 'No [0]'

12.16 *hosp\_fare\_amount\_0*

How much did you pay for a return fare?

Expects a decimal response (required)

**Prerequisites**

Skip when *hosp\_fare\_amount\_0 (12.16)* Less Than '51' OR  
Skip when *hosp\_fare\_0 (12.15)* Equals 'No [0]'

**12.17 hosp\_fare\_amt\_high\_0**

**[You have entered an unusually high number. Please confirm or correct it.]**

Expects a single option response (required)

**Confirmed** [0]

**Correct it** [1]

**Branches**

If response Equals 'Correct it [1]' then skip to *hosp\_fare\_amount\_0 (12.16)*

---

## Section 13. Income

### 13.1 job\_0

We would now like to ask about your employment and income. Please remember that all information you provide is confidential: Which of the following best describes your employment status? Choose one:

Expects a single option response (required)

- Employed [0]
- Self-employed [1]
- Student/learner [2]
- Unemployed and looking for work [3]
- Unemployed and not looking for work [4]

#### Prerequisites

Skip when *job\_0 (13.1)* Equals 'Employed [0]' OR  
Skip when *job\_0 (13.1)* Equals 'Self-employed [1]' OR  
Skip when *job\_0 (13.1)* Equals 'Student/learner [2]' OR  
Skip when *job\_0 (13.1)* Equals 'Unemployed and looking for work [3]'

### 13.2 job\_notlooking\_0

Are you not looking for work but able to work, unable to work, or retired?

Expects a single option response (required)

- Not looking for work but able to work [0]
- Not looking for work and unable to work [1]
- Retired [2]

#### Prerequisites

Skip when *job\_0 (13.1)* Equals 'Student/learner [2]' OR  
Skip when *job\_0 (13.1)* Equals 'Unemployed and looking for work [3]' OR  
Skip when *job\_0 (13.1)* Equals 'Unemployed and not looking for work [4]'

### 13.3 job\_income\_0

How much did you earn last month (excluding grant income), before tax and any other deductions?

Expects a decimal response (required)

#### Prerequisites

Skip when *job\_0 (13.1)* Equals 'Student/learner [2]' OR  
Skip when *job\_0 (13.1)* Equals 'Unemployed and looking for work [3]' OR  
Skip when *job\_0 (13.1)* Equals 'Unemployed and not looking for work [4]'

### 13.4 job\_days\_lost\_0

How many days were you unable to work because of illness in the last 3 months (including health care visits)?

Expects a numeric response (required)

#### Constraints

Response must be Less Than or Equal '93'

#### Prerequisites

Skip when *job\_0 (13.1)* Not Equal 'Student/learner [2]'

### 13.5 job\_stud\_days\_lost\_0

How many days have you been unable to attend school/college because of illness in the last 3 months (including health care visits)?

Expects a numeric response (required)

#### Constraints

Response must be Less Than or Equal '93'

### 13.6 grant\_0

Are you getting a pension or grant?

Expects a single option response (required)

- No [0]  
 Yes [1]

#### Prerequisites

Skip when *grant\_0 (13.6)* Equals 'No [0]'

### 13.7 grant\_list\_0

Please indicate which grants you currently get (tick all that apply)

Expects multiple selected options (required)

- Older person's grant (if over 60 years) [0]  
 Disability grant (if unfit to work) [1]  
 War veteran's grant [2]  
 Grant-in-aid (if in need of full time care) [3]  
 Child support grant (if child younger than 18 years) [4]  
 Foster care grant [5]  
 Care dependence grant (if child has a disability) [6]  
 Social relief of distress award [7]  
 Other [8]

#### Prerequisites

Skip when *grant\_list\_0 (13.7)* Excludes 'Other [8]'

### 13.8 grant\_other\_0

Please specify which other grant you are receiving.

Expects a long text response (required)

#### Prerequisites

Skip when *grant\_0 (13.6)* Equals 'No [0]'

### 13.9 grant\_income\_0

What was your total grant income in the last month?

Expects a decimal response (required)

### 13.10 job\_lost\_0

Have you lost your job or resigned because of illness during the past year?

Expects a single option response (required)

- No [0]  
 Yes [1]

#### Branches

If response Equals 'No [0]' then skip to *ass\_instr\_0 (13.13)*

13.11 job\_lost\_income\_0

Before you lost your job or resigned, how much did you earn in the last month you worked (excluding grant income), before tax and any other deductions?

Expects a decimal response (required)

13.12 job\_lost\_new\_0

Since losing your job or resigning, have you got another job?

Expects a single option response (required)

No [0]

Yes [1]

13.13 ass\_instr\_0

We would now like to ask about the characteristics of your home:

13.14 ass\_rad\_0

Does your household have a television or radio?

Expects a single option response (required)

No [0]

Yes [1]

13.15 ass\_hot\_0

Does your household have a 2-plate hotplate?

Expects a single option response (required)

No [0]

Yes [1]

13.16 asset\_fri\_0

Does your household have a refrigerator?

Expects a single option response (required)

No [0]

Yes [1]

13.17 ass\_mic\_0

Does your household have a microwave?

Expects a single option response (required)

No [0]

Yes [1]

13.18 ass\_sto\_0

Does your household have a stove (hotplate with oven)?

Expects a single option response (required)

No [0]

Yes [1]



13.19 ass\_dst\_0

Does your household have DSTV?

Expects a single option response (required)

No [0]

Yes [1]

---

13.20 ass\_fan\_0

Does your household have a fan?

Expects a single option response (required)

No [0]

Yes [1]

---

13.21 ass\_was\_0

Does your household have a washing machine?

Expects a single option response (required)

No [0]

Yes [1]

---

13.22 ass\_he\_0

Does your household have a heater?

Expects a single option response (required)

No [0]

Yes [1]

---

13.23 ass\_wat\_0

What is the main source of drinking water for members of your household? Please select one option:

Expects a single option response (required)

Outside shared (communal) tap [0]

Tap inside home [1]

Outside home, own tap [2]

Outside other source of water [3]

---

13.24 ass\_toi\_0

What kind of toilet facility do members of your household usually use?

Expects a single option response (required)

Inside own flush toilet [0]

Outside shared flush toilet [1]

Outside own flush toilet [2]

Outside other toilet (not flush) [3]

---

13.25 ass\_roo\_0

How many rooms does your household have?

Expects a numeric response (required)

13.26 ass\_typ\_0

What type of home do you live in?

Expects a single option response (required)

- Shack [0]
- Brick/cement block home [1]
- Flat [2]
- Outbuilding [3]

13.27 occupants\_0

How many people are living with you in your house (include yourself)?

Expects a numeric response (required)

Prerequisites

Skip when *occupants\_0* (13.27) Less Than '13'

13.28 occupants\_high\_0

[You have entered an unusually high number. Please confirm or correct it.]

Expects a single option response (required)

- Confirmed [0]
- Correct it [1]

Branches

If response Equals 'Correct it [1]' then skip to *occupants\_0* (13.27)

13.29 pacic\_instr\_0

Staying healthy can be difficult when you have a chronic condition. We would like to learn about the type of help you get from health workers.

13.30 pacic1\_0

Over the past 3 months, when you received care at the clinic, how often were you: Satisfied that your care was well organized, for example, that there was good coordination between different providers involved with your care?

Expects a single option response (required)

- None of the time [1]
- A little of the time [2]
- Some of the time [3]
- Most of the time [4]
- Always [5]

13.31 pacic2\_0

Over the past 3 months, when you received care at the clinic, how often were you encouraged by providers to take more care of your condition, for example, shown how any actions that you have taken to take care of yourself has improved your condition?

Expects a single option response (required)

- None of the time [1]
- A little of the time [2]
- Some of the time [3]
- Most of the time [4]
- Always [5]

13.32 pacic3\_0

Over the past 3 months, when you received care at the clinic, how often were you: Helped to set specific goals to improve your condition, e.g., getting active, acting on a problem, joining a support group?

Expects a single option response (required)

- None of the time [1]
  - A little of the time [2]
  - Some of the time [3]
  - Most of the time [4]
  - Always [5]
- 

13.33 pacic4\_0

Over the past 3 months, when you received care at the clinic, how often were you: Asked about your understanding of your problem and whether the treatment/interventions recommended were in alignment with your values, beliefs and traditions?

Expects a single option response (required)

- None of the time [1]
  - A little of the time [2]
  - Some of the time [3]
  - Most of the time [4]
  - Always [5]
- 

13.34 pacic5\_0

Over the past 3 months, when you received care at the clinic, how often did you: Obtain skills to help you to deal with your condition better even when under great stress or hard times?

Expects a single option response (required)

- None of the time [1]
  - A little of the time [2]
  - Some of the time [3]
  - Most of the time [4]
  - Always [5]
- 

13.35 pacic6\_0

Over the past 3 months, when you received care at the clinic, how often were you: Encouraged to attend programs in the community that could help you?

Expects a single option response (required)

- None of the time [1]
  - A little of the time [2]
  - Some of the time [3]
  - Most of the time [4]
  - Always [5]
-

13.36 pacic7\_0

Over the past 3 months, when you received care at the clinic, how often were you: Referred to a counsellor or equivalent who could help you with your psychosocial problems?

Expects a single option response (required)

- None of the time [1]
  - A little of the time [2]
  - Some of the time [3]
  - Most of the time [4]
  - Always [5]
- 

13.37 pacic8\_0

Over the past 3 months, when you received care at the clinic, how often were you: Asked how your visits with other providers were going?

Expects a single option response (required)

- None of the time [1]
  - A little of the time [2]
  - Some of the time [3]
  - Most of the time [4]
  - Always [5]
- 

13.38 pacic9\_0

Over the past 3 months, when you received care at the clinic, how often were you given: Information and education about your condition

Expects a single option response (required)

- None of the time [1]
  - A little of the time [2]
  - Some of the time [3]
  - Most of the time [4]
  - Always [5]
- 

13.39 pacic10\_0

Over the past 3 months, when you received care at the clinic, how often did you receive: Follow up appointments for your condition

Expects a single option response (required)

- None of the time [1]
  - A little of the time [2]
  - Some of the time [3]
  - Most of the time [4]
  - Always [5]
- 

13.40 contact\_instr\_0

It is important for our study that we interview you in 6 months time, and again in 12 months time. I will schedule those appointments and we will send you SMS reminders 2 weeks before the appointment. I will provide you with a contact number. Please let us know if your cell phone number changes or if you need to reschedule the appointment. In order to make it as easy as possible to contact you if necessary, I would be grateful if you could provide as many of the following contact details as possible:

---

13.41 address\_home\_0

Home address

Expects a long text response (optional)

13.42 phone\_home\_0

Telephone number at home

Expects a phone number (optional)

Constraints

Response must be Match `^[0-9]{10}$`

13.43 phone\_cell\_confirm\_set\_0

Operator

This field is not displayed on the device, Operator: `__{SET(514161, phone_cell_0 (7.6))}__`

13.44 phone\_cell\_confirm\_0

Please confirm the following cell phone number as correct:

Expects a phone number (optional)

Constraints

Response must be Match `^[0-9]{10}$`

13.45 phone\_work\_0

Work telephone number

Expects a phone number (optional)

Constraints

Response must be Match `^[0-9]{10}$`

13.46 phone\_other\_0

Alternative number (friend, relative, neighbour)

Expects a phone number (optional)

Constraints

Response must be Match `^[0-9]{10}$`

13.47 folder\_0

Clinic folder number

Expects a single line text response (required)

13.48 is\_sa\_citizen\_0

What type of identity document do you have?

Expects a single option response (required)

- South African [0]
- Other [1]

**Prerequisites**

Skip when *is\_sa\_citizen\_0 (13.48)* Equals 'Other [1]'

**13.49 sa\_id\_1\_0**

**South African ID number**

Expects a numeric response (optional)

**Constraints**

Response must be *Match* ' \_\_{VALID\_RSA\_ID}\_\_ '

---

**Prerequisites**

Skip when *is\_sa\_citizen\_0 (13.48)* Equals 'Other [1]'

**13.50 sa\_id\_2\_0**

**Re-enter ID number**

Expects a numeric response (optional)

**Constraints**

Response must be *Equals* 'sa\_id\_1\_0 (13.49)'

---

**Prerequisites**

Skip when *is\_sa\_citizen\_0 (13.48)* Equals 'South African [0]'

**13.51 other\_id\_0**

**Enter the identity/passport number.**

Expects a single line text response (optional)

**13.52 goodbye\_instr\_0**

We would like to thank you for your time today. We look forward to seeing you in 6 months.

---



## Section 14. Schedule

### 14.1 `followup_scheduled_dyna_0`

#### Operator

This field is not displayed on the device, Operator: `Set( followup_scheduled_0 (14.2) , DATEADD( DATENOW ,182) )`

---

### 14.2 `followup_scheduled_0`

We have reached the end of the interview and would like to schedule your 6m assessment. Your 6m ideal date is : `DATEADD( DATENOW ,182)`  
[Fieldworker: Please schedule an appointment with the participant as close to the ideal date as possible] NB!! Please fill in the appointment card and diary!

Expects a date response (required)

### 14.3 `followup_days_diff_0`

#### Numeric

This field is not displayed on the device, Value: 0

---

### 14.4 `followup_days_setter_0`

#### Operator

This field is not displayed on the device, Operator: `__{SET(523979, __{ROUND( __{DAYSBETWEEN( DATEADD( DATENOW ,182) , followup_scheduled_0 (14.2) )} __,0)} __)}`

---

#### Prerequisites

Skip when `followup_days_diff_0 (14.3)` Greater Than '-14' AND  
Skip when `followup_days_diff_0 (14.3)` Less Than '14'

### 14.5 `followup_scheduled_warning_0`

**WARNING!** The date you selected is more than 2 weeks outside the ideal date. Choose Correct It to change the appointment date, or select Proceed to confirm the appointment for `followup_scheduled_0 (14.2)`

Expects a single option response (required), Default: Correct it

Correct it [0]

Proceed [1]

#### Branches

If response Equals 'Correct it [0]' then skip to `followup_scheduled_0 (14.2)`

---

### 14.6 `followup12_scheduled_dyna_0`

#### Operator

This field is not displayed on the device, Operator: `Set( followup12m_scheduled_0 (14.7) , DATEADD( DATENOW ,365) )`

---

### 14.7 `followup12m_scheduled_0`

Please schedule your 12m assessment. Your 12m ideal date is : `DATEADD( DATENOW ,365)` [Fieldworker: Please schedule an appointment with the participant as close to the ideal date as possible]

Expects a date response (required)

### 14.8 `followup12m_days_diff_0`

#### Numeric

This field is not displayed on the device, Value: 0

---



#### 14.9 followup12m\_days\_setter\_0

##### Operator

This field is not displayed on the device, Operator: `__{SET(525930,__{ROUND(__{DAYSBETWEEN( DATEADD( DATENOW ,365) , followup12m_scheduled_0 (14.7) )} ,0)}__)}__`

---

##### Prerequisites

Skip when *followup12m\_days\_diff\_0 (14.8)* Greater Than '-14' AND  
Skip when *followup12m\_days\_diff\_0 (14.8)* Less Than '14'

#### 14.10 followup12m\_scheduled\_warning\_0

**WARNING!** The date you selected is more than 2 weeks outside the ideal date. Choose Correct It to change the appointment date, or select Proceed to confirm the appointment for **followup12m\_scheduled\_0 (14.7)**

Expects a single option response (required), Default: Correct it

Correct it [0]

Proceed [1]

##### Branches

If response Equals 'Correct it [0]' then skip to *followup12m\_scheduled\_0 (14.7)*

---

## Section 15. End

### 15.1 comment\_0

Text

This field is not displayed on the device

---

#### Prerequisites

Skip when *phq9b\_0 (5.11)* Equals '1 - 7 days [1]' OR

Skip when *phq9b\_0 (5.11)* Equals '0 days [0]'

### 15.2 phqscorefb\_1\_0

[Please read the following:] I am concerned about how you are feeling and would like to ask a nurse to see you at the end of this interview. [Please fill in the Mental Health referral letter' and lead the patient to the nurse at the end of the interview.]

---

#### Prerequisites

Skip when *phq9b\_0 (5.11)* Equals '8 - 11 days [2]' OR

Skip when *phq9b\_0 (5.11)* Equals '12 -14 days [3]' OR

Skip when *phq9b\_0 (5.11)* Equals '0 days [0]'

### 15.3 phqscorefb\_2\_0

[Please read the following:] At the end of the interview I will give you a leaflet with some contact details for people who will be able to help with how you are feeling.

---

#### Prerequisites

Skip when *ref\_bp\_0 (1.9)* Equals '0'

### 15.4 high\_bp\_warn\_0

I am concerned about your blood pressure which was very high. I would like to ask a nurse to see you today to assess it further. [Please fill in the 'high BP referral letter' and lead the patient to the nurse at the end of the interview.]

---

#### Prerequisites

Skip when *ref\_vl\_0 (1.8)* Equals '0'

### 15.5 vl\_ref\_letter

I would like to request that you have a viral load test done today as part of the study. [Please fill in the 'Viral load referral letter' and lead the patient to the nurse at the end of the interview.]

---

#### Prerequisites

Skip when *preconsent\_0 (4.2)* Equals 'Yes [1]'

### 15.6 no\_preconsent\_0

You do not qualify for the study. However, we would like to thank you for your time today and we wish you well. [Select PROCEED to continue to the end of the survey.]

Expects a single option response (required)

Proceed [1]

#### Branches

If response Equals 'Proceed [1]' then skip to *end\_0 (15.10)*

---

**Prerequisites**

Skip when *age\_under18\_0 (4.6)* Not Equal 'Proceed [1]'

**15.7 age\_less18\_0**

You do not qualify for the study, However, we would like to thank you for your time today and we wish you well. [Select PROCEED to continue to the end of the survey.]

Expects a single option response (required)

Proceed [1]

**Branches**

If response Equals 'Proceed [1]' then skip to *end\_00 (15.11)*

---

**Prerequisites**

Skip when *area\_0 (4.7)* Equals 'Yes [1]'

**15.8 no\_area\_0**

You do not qualify for the study. However, we would like to thank you for your time today and we wish you well. [Select PROCEED to continue to the end of the survey.]

Expects a single option response (required)

Proceed [1]

**Branches**

If response Equals 'Proceed [1]' then skip to *end\_00 (15.11)*

---

**Prerequisites**

Skip when *area\_0 (4.7)* Equals 'No [0]' OR

Skip when *preconsent\_0 (4.2)* Equals 'No [0]' OR

Skip when *age\_under18\_0 (4.6)* Equals 'Proceed [1]'

**15.9 voucherno\_0**

Please issue a voucher for the patient and record the voucher number:

Expects a single line text response (required)

**Prerequisites**

Skip when *area\_0 (4.7)* Equals 'No [0]' OR

Skip when *preconsent\_0 (4.2)* Equals 'No [0]' OR

Skip when *age\_under18\_0 (4.6)* Equals 'Proceed [1]'

**15.10 end\_0**

You have reached the end of the baseline survey. Press BACK to update any responses. MENUACTION(CUSTOMWEB,PARTICIPANT OVERVIEW)

---

**Prerequisites**

Skip when *area\_0 (4.7)* Equals 'Yes [1]' OR

Skip when *preconsent\_0 (4.2)* Equals 'Yes [1]'

**15.11 end\_00**

You have reached the end of the baseline survey. Press BACK to update any responses.

---

**Prerequisites**

Skip when *area\_0 (4.7)* Equals 'No [0]' OR

Skip when *preconsent\_0 (4.2)* Equals 'No [0]' OR

Skip when *age\_under18\_0 (4.6)* Equals 'Proceed [1]'

**15.12 set\_reached\_end\_0**

**Operator**

This field is not displayed on the device, Operator: Set( reached\_end\_0 (1.18) ,1)

---

**15.13 end\_000**

Press NEXT to submit.

---
